# Supplementary material for: Effects of Lactobacillus rhamnosus GG and Bifidobacterium lactis Bb12 on beta-cell function in children with newly diagnosed type 1 diabetes: protocol of a randomised controlled trial
Source: PubMed Central journal article supplement — BMJ Open. 2017 Oct 11;7(10):e017178. doi: 10.1136/bmjopen-2017-017178 (PMC5652563; doi:10.1136/bmjopen-2017-017178), 2017-10-11
Supplement: bmjopen-2017-017178.draft_revisions.pdf [file bmjopen-2017-017178.draft_revisions.pdf]

# BMJ Open

BMJ Open is committed to open peer review. As part of this commitment we make the peer review history of every article we publish publicly available.

When an article is published we post the peer reviewers' comments and the authors' responses online. We also post the versions of the paper that were used during peer review. These are the versions that the peer review comments apply to.

The versions of the paper that follow are the versions that were submitted during the peer review process. They are not the versions of record or the final published versions. They should not be cited or distributed as the published version of this manuscript.

BMJ Open is an open access journal and the full, final, typeset and author-corrected version of record of the manuscript is available on our site with no access controls, subscription charges or pay-per-view fees (<http://bmjopen.bmj.com>).

If you have any questions on BMJ Open's open peer review process please email [editorial.bmjopen@bmj.com](mailto:editorial.bmjopen@bmj.com)

# BMJ Open

## Effects of *Lactobacillus rhamnosus* GG and *Bifidobacterium lactis* Bb12 on beta-cell function in children with newly diagnosed type 1 diabetes: protocol of a randomised controlled trial.

|                                 |                                                                                                                                                                                                                                                                                |
|---------------------------------|--------------------------------------------------------------------------------------------------------------------------------------------------------------------------------------------------------------------------------------------------------------------------------|
| Journal:                        | <i>BMJ Open</i>                                                                                                                                                                                                                                                                |
| Manuscript ID                   | bmjopen-2017-017178                                                                                                                                                                                                                                                            |
| Article Type:                   | Protocol                                                                                                                                                                                                                                                                       |
| Date Submitted by the Author:   | 06-Apr-2017                                                                                                                                                                                                                                                                    |
| Complete List of Authors:       | Groele, Lidia; Warszawski Uniwersytet Medyczny 1 Wydział Lekarski, Department of Paediatrics<br>SZAJEWSKA, Hania; The Medical University of Warsaw, Dept of Paediatrics<br>Szybowska, Agnieszka; Warszawski Uniwersytet Medyczny 1 Wydział Lekarski, Department of Paediatrics |
| <b>Primary Subject Heading</b>: | Diabetes and endocrinology                                                                                                                                                                                                                                                     |
| Secondary Subject Heading:      | Paediatrics                                                                                                                                                                                                                                                                    |
| Keywords:                       | probiotics, microbiota, children, RCT                                                                                                                                                                                                                                          |
|                                 |                                                                                                                                                                                                                                                                                |

SCHOLARONE™  
Manuscripts

1  
2  
3 **Effects of *Lactobacillus rhamnosus* GG and *Bifidobacterium lactis* Bb12 on beta-cell**  
4 **function in children with newly diagnosed type 1 diabetes: protocol of a randomised**  
5 **controlled trial.**  
6

7 Lidia Groele, Hania Szajewska, Agnieszka Szypowska

8 The Medical University of Warsaw, Department of Paediatrics, Warsaw, Poland  
9

10  
11  
12 **Corresponding author:**

13 Agnieszka Szypowska, MD, PhD, Assoc Prof

14 Department of Paediatrics, The Medical University of Warsaw

15 Żwirki i Wigury 63A, 02-091 Warsaw, Poland,

16 email: agnieszka.szypowska@gmail.com  
17  
18  
19  
20  
21  
22

23 **Date and protocol version identifier:** 1/02/2017

24 **Key words:** probiotics, microbiota, children, RCT

25 **Word count:** 3993  
26  
27  
28  
29  
30  
31  
32  
33  
34  
35  
36  
37  
38  
39  
40  
41  
42  
43  
44  
45  
46  
47  
48  
49  
50  
51  
52  
53  
54  
55  
56  
57  
58  
59  
60

**ABSTRACT**

**Introduction.** Recent evidence has demonstrated that, among other factors, dysbiosis (imbalances in the composition and function of the gut microbiota) may be relevant in the development of type 1 diabetes (T1D). Thus, gut microbiota may be a target for improving outcomes in subjects with T1D. The aim of the study is to examine the effects of *Lactobacillus rhamnosus* GG and *Bifidobacterium lactis* Bb12 on beta-cell function in children with newly diagnosed T1D.

**Methods and analysis:** A total of 96 children aged 8 to 17 years with newly diagnosed T1D, confirmed by clinical history and the presence of at least one positive autoantibody, will be enrolled in a double-blind, randomised, placebo-controlled trial in which they will receive *Lactobacillus rhamnosus* GG and *Bifidobacterium lactis* Bb12 at a dose of  $10^9$  colony-forming units or an identically appearing placebo, orally, once daily, for 6 months. The follow-up will be for 12 months. The primary outcome measures will be the area under the curve of the C-peptide level during 2-h responses to a mixed meal.

**Ethics and dissemination:** The Bioethics Committee approved the study protocol. The findings of this trial will be submitted to a peer-reviewed paediatric journal. Abstracts will be submitted to relevant national and international conferences.

**Trial registration number:** The study protocol is under registration at ClinicalTrials.gov. NCT03032354

**Strengths and limitations of this study**

- The study design (randomised controlled trial, RCT) is the most robust methodology to assess the effectiveness of therapeutic interventions.
- The findings of this RCT, whether positive or negative, will contribute to the formulation of further recommendations on the use of *Lactobacillus rhamnosus* GG and *Bifidobacterium lactis* Bb12 for improving beta-cell function in children with newly diagnosed type 1 diabetes (T1D).
- It remains unclear which probiotics, alone or in combination, and at which doses, are potentially the most useful for management of T1D.

## INTRODUCTION

### *Type 1 diabetes*

Type 1 diabetes (T1D) involves the autoimmune destruction of the insulin-secreting pancreatic islets of Langerhans, leading to insulin deficiency.<sup>1,2</sup> The prevalence of T1D varies considerably geographically,<sup>3</sup> but in many regions it is rising.<sup>4</sup> The pathophysiology is multifactorial. In addition to genetic background, a number of environmental factors have been claimed to influence the T1D epidemiology, including a mode of birth, early infant diet (lack of breastfeeding, early introduction of cow's milk, gluten), viral infections, and antibiotic use.<sup>5,6,7</sup> Recent evidence has demonstrated that dysbiosis, defined as imbalances in the composition and function of the gut microbiota, also may be relevant.

### *Gut microbiota & type 1 diabetes*

Current studies suggest that the interaction between gut microbiota and the immune system may be a major factor influencing T1D development. Alterations in gut microbiota composition observed in T1D patients would increase gut permeability. Microbes, microbial metabolites, bacterial products, and the immune responses to them may promote inflammation and induce an alteration in intestinal barrier function. If so, that facilitates greater exposure to the immune system of dietary antigens and microbiota-derived products, which may cause a proinflammatory response and stimulate beta-cell autoimmunity in genetically predisposed subjects.<sup>8</sup>

Compared to healthy controls, subjects with T1D exhibit a less diverse and less stable gut microbiota.<sup>9,10,11,12,13</sup> A low abundance of lactate- and butyrate-producing species has been noted in children with T1D.<sup>14</sup> Butyrate is the main energy source for colonic epithelial cells. It induces mucin synthesis and increases the barrier mechanisms of tight junctions. It also decreases bacterial transport across the gut epithelium.<sup>15,16</sup> Adequate butyrate production is essential for gut integrity and may have a protective effect on the development of anti-islet cell autoantibodies.<sup>17</sup>

It seems that the diabetic gut is underequipped with bacteria that promote protective immune mechanisms.<sup>18</sup> In children with beta-cell autoimmunity, a significant decrease in the numbers of *Lactobacillus* and *Bifidobacterium* was observed.<sup>11</sup> These are the major genera of bacteria that make up the colon flora in humans, constitute intestinal microbial homeostasis, inhibit growth of pathogens, improve the gut mucosal barrier, and modulate local and systemic

1  
2  
3 immune responses. Dysbiosis causes changes in the local immune systems of T1D patients  
4 demonstrated, for example, by the low expression of FOXP3 and impaired induction of  
5 FOXP3-positive regulatory T cells by small intestinal dendritic cells.<sup>19</sup>  
6  
7

8  
9  
10 For a detailed review of studies evaluating the role of the gut microbiota in these patients, see  
11 the review by *Gulden et al.*<sup>20</sup>  
12

### 13 14 15 *Microbiota modulation strategies*

16 With the growing recognition of the role of gut microbiota in health and disease, it has  
17 become clear that gut microbiota may be a target for improving outcomes in subjects affected  
18 by or at risk for certain diseases, including T1D. To date, modification of the gut microbiota  
19 via the provision of probiotics (defined as live microorganisms that, when administered in  
20 adequate amounts, confer a health benefit on the host)<sup>21</sup> is the most extensively studied  
21 strategy. In humans, by far, the most commonly used probiotics are bacteria from the genus  
22 *Lactobacillus* or *Bifidobacterium*.  
23  
24  
25  
26  
27

28  
29  
30 Data on the effects of probiotics in subjects with T1D are very limited. However, preliminary  
31 data are promising. In animals, studies using non-obese diabetic (NOD) mice or a rat model  
32 showed that the development of T1D can be prevented or delayed through modulation of the  
33 intestinal microbiota.<sup>22,23</sup> Administration of *Lactobacillus johnsoni* N6.2, isolated from  
34 BioBreeding diabetes-resistant rats, delays or inhibits the onset of T1D in BioBreeding  
35 diabetes-prone rats. Transmission of segmented filamentous bacteria to the NOD mouse  
36 correlates with disease prevention and the upregulation of Th17 cells in the intestine.<sup>24,25</sup>  
37  
38  
39  
40  
41

42  
43 In humans, one, recent, prospective, cohort study, which was carried out as part of the  
44 TEDDY (The Environmental Determinants of Diabetes in the Young) study, aimed to  
45 examine the association between early probiotic exposure and islet autoimmunity (positive  
46 antibodies to insulin, glutamic acid decarboxylase, or insulinoma antigen 2 on at least two  
47 consecutive visits) in children genetically at increased risk for T1D. This study found that  
48 early (i.e., during the first 27 days of life) administration of probiotics (mainly  
49 *Lactobacillus* and *Bifidobacterium*, given either as a supplement or in infant formula  
50 supplemented with probiotics) may be associated with a reduced risk of islet autoimmunity  
51 [hazard ratio (HR) 0.66, 95% confidence interval (CI) 0.46–0.94], especially in children with  
52 the highest-risk HLA genotype of DR3/4 (HR 0.4, 95% CI 0.21–0.74). Of note, no reduction  
53  
54  
55  
56  
57  
58  
59  
60

1  
2  
3 was seen in children with moderately higher-risk genotypes (HR 0.97, 95% CI 0.62–1.54).<sup>26</sup>  
4  
5 Further studies to confirm this association are needed.  
6  
7

### 8 *Lactobacillus rhamnosus* GG and *Bifidobacterium lactis* B12

9  
10 These are among the world's best-studied probiotics. In the US, both have received a  
11 Generally Recognised As Safe (GRAS) status by the Food and Drug Administration.<sup>27</sup> In  
12 Europe, both have been granted Qualified Presumption of Safety (QPS) status by the  
13 European Food Safety Authority (EFSA) - a status granted on a species level.<sup>28</sup> Previous  
14 studies found that supplementation with *Lactobacillus rhamnosus* GG (*L rhamnosus* GG) and  
15 *Bifidobacterium lactis* Bb12 (*B lactis* Bb12) improved blood glucose control in  
16 normoglycaemic pregnant women and reduced the frequency of gestational diabetes  
17 mellitus,<sup>29,30</sup> thus, suggesting a role for these probiotics in glucose control.  
18  
19  
20  
21  
22  
23

## 24 **TRIAL OBJECTIVES AND HYPOTHESIS**

25  
26 The aim of the study is to examine the effects of *L rhamnosus* GG and *B lactis* Bb12 on beta-  
27 cell function in children with newly diagnosed T1D. We hypothesise that gut microbiota  
28 modulation with the combination of these two probiotics may be used as a tool to modulate  
29 the immune system for preventing islet cell destruction. We also speculate that children who  
30 receive *L rhamnosus* GG and *B lactis* Bb12 at the recognition of T1D will have more  
31 preserved beta-cell function than children who receive placebo.  
32  
33  
34  
35  
36

## 37 **METHODS**

### 38 *Trial design*

39  
40 This study is designed as a randomised, double-blind, placebo-controlled trial with allocation  
41 of 1:1. The trial was registered at the ClinicaTrials.gov (NCT03032354) prior to the inclusion  
42 of the first patient. Any important changes in the protocol will be implemented there.  
43  
44  
45  
46

### 47 *Settings and participants*

48  
49 Recruitment will be through the paediatric diabetes outpatient clinics at two participating  
50 centres in Warsaw, Poland (Department of Paediatrics, the Medical University of Warsaw and  
51 Department of Endocrinology and Diabetology, Children's Memorial Health Institute). Both  
52 are tertiary care hospitals that provide annually diabetes care to more than 200 children with  
53 newly recognised T1D. The personnel are adequately trained and competent in conducting  
54  
55  
56  
57  
58  
59  
60



1  
2  
3 clinical trials. The start of the recruitment is planned in April 2017 and should be completed  
4 within the following 1 year.  
5  
6

### 7 8 *Eligibility criteria*

9 Eligible children must fulfil all of the following inclusion criteria:

- 10  
11
- 12 • T1D as defined by ISPAD criteria<sup>31</sup>, diagnosed within 60 days;
  - 13 • Presence of at least one positive autoantibody [autoantibodies to glutamic acid  
14 decarboxylase (GAD), the tyrosine phosphatase-related insulinoma-associated 2 molecule  
15 (anti-IA-2), islet-cell antibodies (ICA)];
  - 16 • Age 8-17 years
  - 17 • Single fasting C-peptide level  $\geq 0.4$ ng/ml
  - 18 • Written informed consent signed by parents (and patients if older than 16 years).
- 19  
20  
21  
22

23 Subjects will be excluded for the following reasons:

- 24
- 25 • Antibiotic treatment within 4 weeks prior to enrolment
  - 26 • Use of probiotics within 2 weeks prior to enrolment
  - 27 • Gastrointestinal infection within 2 weeks prior to enrolment
  - 28 • Chronic gastrointestinal diseases (e.g., inflammatory bowel disease, coeliac disease, food  
29 allergy)
  - 30 • Immunodeficiency
- 31  
32  
33  
34  
35  
36  
37

### 38 *Interventions*

39 The intervention will be administration of a combination of two probiotics: *L rhamnosus* GG  
40 (strain deposit number ATCC 53103) and *B lactis* Bb12 (strain deposit number DSM15954).  
41 A placebo comparator was chosen as the gold standard for testing the efficacy of a new  
42 treatment.<sup>32</sup> The placebo will contain maltodextrin, and its taste and appearance will be  
43 identical to those of the active product. The study products will be manufactured in capsules  
44 and supplied by Chr. Hansen Holding A/S, Denmark. The manufacturer will have no role in  
45 the conception, protocol development, design, or conduct of the study, or in the analysis or  
46 interpretation of the data.  
47  
48  
49  
50  
51  
52

### 53 *Study procedure*

54 The study procedures are described in Table 1. Patients and parents/caregivers will receive  
55 oral and written information regarding the study during their regular diabetes outpatient clinic  
56  
57  
58  
59  
60

1  
2  
3 visits within 60 days after T1D recognition. Written informed consent, signed by the legal  
4 caregivers and/or the patients, will be obtained by a physician involved in the study.  
5  
6

7  
8 Participants will be randomly assigned to two groups, receiving either *L rhamnosus* GG and *B*  
9 *lactis* Bb12 at a dose of  $10^9$  colony-forming units (CFU) or placebo, orally, once daily, for 6  
10 months. All study participants will be followed up for up to 12 months after the start of the  
11 intervention. Study visits at month 3, 6, and 12 will be coordinated with diabetes outpatient  
12 clinic visits.  
13  
14  
15

16  
17  
18 During the hospitalisation at diabetes recognition, a blood sample will be obtained for the  
19 measurement of fasting C-peptide, anti-GAD, anti-IA-2, ICA (analysed by radiobinding  
20 assays), and HbA1c levels (performed by high-performance liquid chromatography ). As T1D  
21 is frequently associated with autoimmune thyroid disease, anti-thyroid peroxidase (anti-TPO),  
22 anti-thyroglobulin (anti-Tg), serum thyroid-stimulating hormone (TSH), and and free  
23 thyroxine (fT4) will be assessed (by chemiluminescence method) at diabetes onset and at  
24 month 12. Similarly, as T1D is associated with coeliac disease, all subjects will be tested for  
25 anti-tissue transglutaminase type 2 (anti-TG2) antibodies (analyzed by Elisa test) and/or  
26 endomysial antibodies (EMA) (performed by indirect immunofluorescence method) at  
27 diabetes recognition and at month 12. In addition, at diabetes onset, total serum IgA will be  
28 measured (by nephelometric analysis) to exclude IgA deficiency. In the case of IgA  
29 deficiency, the same type of antibodies in the IgG class will be analysed. In the case of  
30 positive serology, a small-intestine biopsy will be considered to confirm the diagnosis of  
31 coeliac disease in line with current European guidelines.<sup>33</sup> Interleukins as inflammatory  
32 markers will be compared (by Elisa tests) between groups at diabetes onset and month 6 and  
33 12.  
34  
35  
36  
37  
38  
39  
40  
41  
42  
43  
44  
45

46 At study entry and at all study visits, all eligible children will undergo a physical examination,  
47 including evaluation of anthropometric measurements (weight, height and body mass index  
48 [BMI]), which were plotted on WHO 2007 growth curves.<sup>34</sup> The total daily insulin dose and  
49 basal insulin will be downloaded from insulin pumps or will be collected from patients'  
50 diaries.  
51  
52  
53  
54  
55

56 In our study, we chose to use the mixed-meal tolerance test (MMTT), as it is widely regarded  
57 as the gold standard for measuring endogenous insulin production among patients with type 1  
58  
59  
60

1  
2  
3 diabetes.<sup>35</sup> The MMTT will be performed at months 6 and 12. For the MMTT, all eligible  
4 participants will consume a standard, mixed meal [liquid-meal BOOST test (6 mL/kg max  
5 360 ml, Nestle S.A>, Vevey, Switzerland; 237 ml contains 41 g carbohydrates, 10 g protein, 4  
6 g fat, energy value 240 kcal)]. The C-peptide levels will be measured in blood samples drawn  
7 every 30 minutes for 2 hours after the mixed meal consumption.  
8  
9

10  
11  
12  
13 Compliance will be assessed by collecting empty packages and the remainder of the product  
14 that was not used as well as by direct interview with the patient and/or caregiver. Participants  
15 receiving <75% of the recommended doses will be considered as non-compliant.  
16  
17

18  
19 At any point of time, caregivers will have the right to withdraw the participating child from  
20 the study without giving the reason for discontinuation. There will be no effect of this  
21 discontinuation on subsequent physician and/or institutional medical care.  
22  
23

#### 24 25 26 *End points*

##### 27 28 *Primary*

- 29 • Area under the curve of the C-peptide level (AUC CP) during 2-h responses to a mixed  
30 meal.  
31  
32

##### 33 34 35 *Secondary*

- 36 • Fasting C-peptide concentration
- 37 • Insulin requirement (U/kg body mass)
- 38 • HbA1c,
- 39 • Interleukins: IL-1, IL-2, IL-10, TNF- $\alpha$ , IFN- $\gamma$
- 40 • Anthropometric parameters (weight, BMI z-score)
- 41 • Side effects (abdominal pain, diarrhoea, constipation, vomiting, flatulence)
- 42 • Occurrence of other autoimmune diseases (autoimmune thyroid disease, coeliac disease)
- 43 • Acute complications of T1D such as severe hypoglycaemia or ketoacidosis
- 44  
45  
46  
47  
48  
49  
50

##### 51 52 53 *Participant timeline*

54 The time schedule for enrolment, interventions, assessment, and visits for the participants is  
55 described in Table 1.  
56  
57  
58  
59  
60

### *Sample size*

The sample size was calculated based on recommendations on sample size calculation to be used in studies on the effects of new agents on the 2-hour AUC of the C-peptide in MMTT in newly diagnosed T1D patients by Lachin.<sup>36</sup> A normalizing transformation  $\ln(x+1)$  for C-peptide AUC is planned to be used. Since there are no studies that have evaluated the use of probiotics in T1D patients, the study plans to detect a 50% increase in the (untransformed) 2-hour AUC of C-peptide values in MMTT at 12th month in the treated group relative to the placebo group. It is assumed that fractions of children in age groups 8-12 and 13-17 years of age are equal (50%). To provide 85% power using a one-sided test at the confidence level of 0.05, with 1:1 randomization and assuming a drop-out rate of 10%, a sample size of 96 subjects is needed (calculation based on mean and RMSE estimates 0.25 and 0.142, and 0.30 and 0.204 for age groups 8-12 years and 13-17 years, respectively).

### *Randomisation*

The randomisation list, which is separate for each centre, will be generated using the statistical program StatsDirect by an independent person and will be kept by a staff member not involved in the trial. In order to obtain comparable groups, block randomisation will be performed (each block will contain four patients: 2 in the intervention group and 2 in the control group).

### *Blinding*

All participants and investigators will be blinded to the assigned treatment throughout the study. The products for both groups will be similar in terms of smell and colour and will be packed in identical packages.

### *Allocation concealment*

The study products will be packaged and assigned consecutive numbers according to the randomisation list. Independent personnel not involved in the conduct of the trial will dispense the numbered study products.

### *Data collection and management*

All study participants will be assigned a study identification number. Case report forms (CRFs) will be completed on paper forms. Data will then be entered and stored in a password-

1  
2  
3 protected electronic database. The original paper copies of CRFs and all study data will be  
4 stored in a locker within the study site, accessible to the involved researchers only.  
5  
6

### 7 8 *Monitoring*

9 An independent Data and Safety Monitoring Board (DSMB) will be set up prior to the start of  
10 the study. The DSMB will review data after recruitment of 25%, 50% and 75% participants to  
11 review the study progress and all adverse events.  
12  
13

### 14 15 16 **Statistical analysis**

17 All statistical analyses will be performed with the computer software StatsDirect. The Student  
18 t-test will be used to compare mean values of continuous variables approximating a normal  
19 distribution. For non-normally distributed variables, the Mann-Whitney U test will be used.  
20 The mixed-effects ANCOVA model, using the baseline value as a covariate, will assess the  
21 effect of probiotic treatment on the AUC of the C-peptide level, HbA1c levels, and insulin  
22 dosage. The chi-square test or Fisher exact test will be used, as appropriate, to compare  
23 percentages. Moreover, relative risk (RR), 95% CI, and number needed to treat (NNT) will be  
24 calculated using the same computer software. The differences between study groups will be  
25 considered significant when the P-value is <0.05 or when the 95% CI for RR does not include  
26 1 (equivalent to P<0.05) All statistical tests performed will be two-tailed tests. All analyses  
27 will be performed on the intention-to-treat basis (i.e., all participants are included in the arm  
28 to which they were allocated, whether or not they received [or completed] the intervention  
29 given to that arm) and per-protocol analysis (i.e., an analysis of the subset of participants who  
30 complied with the protocol).  
31  
32  
33  
34  
35  
36  
37  
38  
39  
40  
41  
42

### 43 **Harms**

44 Data on adverse events will be collected. All serious adverse events will be immediately  
45 reported to the project leader who will be responsible for notifying the Ethics Committee, all  
46 participating investigators, and the manufacturer of the study products.  
47  
48  
49

### 50 51 **Auditing**

52 The Ethics Committee did not require auditing for this study.  
53  
54  
55

### 56 **Ethics and dissemination**

57  
58  
59  
60

1  
2  
3 Verbal and written information regarding informed consent will be presented to the caregivers  
4 and/or patients. Any modifications to the protocol that may affect the conduct of the study  
5 will be presented to the Committee. The full protocol will be available freely due to open  
6 access publication. The findings of this RCT will be submitted to a peer-reviewed journal.  
7  
8 Abstracts will be submitted to relevant national and international conferences. The standards  
9 from the guidelines of the Consolidated Standards of Reporting Trials (CONSORT) will be  
10 followed for this RCT.  
11  
12

13  
14  
15  
16 **Contributorship statement:** AS conceptualised the study. LG developed the first draft of the  
17 manuscript. HS contributed to the development of the study protocol and approved the final  
18 draft of the manuscript.  
19  
20

21  
22  
23 **Funding statement:** This study will be funded by grant provided by the Nutricia Foundation  
24 and the Polish Diabetes Association.  
25  
26

27  
28 **Competing interests statement:** The authors declare that they have no competing interests.  
29  
30  
31  
32  
33  
34  
35  
36  
37  
38  
39  
40  
41  
42  
43  
44  
45  
46  
47  
48  
49  
50  
51  
52  
53  
54  
55  
56  
57  
58  
59  
60

**REFERENCES**

- 1 Atkinson MA, Eisenbarth GS, Michels AW. Type 1 diabetes. *Lancet* 2014;383:69-82.
- 2 American Diabetes Association. Standards of medical care in diabetes-2014. *Diab Care* 2014;Suppl.1:s14-s80.
- 3 Patterson CC, Dahlquist GG, Gyürüs E, et al. EURODIAB Study Group Incidence trends for childhood type 1 diabetes in Europe during 1989–2003 and predicted new cases 2005–20: a multicentre prospective registration study. *Lancet* 2009;373: 2027–33.
- 4 DIAMOND Project Group. Incidence and trends of childhood type 1 diabetes worldwide 1990–1999. *Diabet Med* 2006;23: 857–66.
- 5 Mejía-León ME, Petrosino JF, Ajami NJ, et al. Fecal microbiota imbalance in Mexican children with type 1 diabetes. *Sci Rep* 2014;4:3814.
- 6 Patelarou E, Girvalaki C, Brokalaki H, et al. Current evidence on the associations of breastfeeding, infant formula, and cow's milk introduction with type 1 diabetes mellitus: a systematic review. *Nutr Rev* 2012;70:509-19.
- 7 Knip M, Virtanen SM, Akerblom HK. Infant feeding and the risk of type 1 diabetes. *Am J Clin Nutr* 2010;91:1506–13.
- 8 Semenkovich CF, Danska J, Darsow T, et al. American Diabetes Association and JDRF Research symposium: diabetes and the microbiome. *Diabetes* 2015;64:3967-77.
- 9 Giongo A, Gano KA, Crabb DB et al. Toward defining the autoimmune microbiome for type 1 diabetes. *ISME J* 2011;5:82-91.
- 10 Brown CT, Davis-Richardson AG, Giongo A, et al. Gut microbiome metagenomics analysis suggests a functional model for the development of autoimmunity for type 1 diabetes. *PLoS One* 2011;6:e25792.
- 11 Murri M, Leiva I, Gomez-Zumaquero JM, et al. Gut microbiota in children with type 1 diabetes differs from that in healthy children: a case-control study. *BMC Med* 2013;11:46.
- 12 de Goffau MC, Luopajarvi K, Knip M ,et al. Fecal microbiota composition differs between children with  $\beta$ -cell autoimmunity and those without. *Diabetes* 2013;62:1238-44.
- 13 Endesfelder D, zu Castell W, Ardisson A, et al. Compromised gut microbiota networks in children with anti-islet cell autoimmunity. *Diabetes* 2014;63:2006–14.
- 14 Vaarala O. Human intestinal microbiota and type 1 diabetes. *Curr Diab Rep* 2013;13:601-7.
- 15 Hague A, Butt AJ, Paraskeva C. The role of butyrate in human colonic epithelial cells: an energy source or inducer of differentiation and apoptosis? *Proc Nutr Soc* 1996;55:937-43.
- 16 Peng L, Li ZR, Green RS, et al. Butyrate enhances the intestinal barrier by facilitating tight



1  
2  
3  
4 junction assembly via activation of AMP-activated protein kinase in Caco-2 cell monolayers.  
5  
6 *J Nutr* 2009;139:1619-25.

7  
8 <sup>17</sup> Endesfelder D, Engel M, Davis-Richardson AG, et al. Towards a functional hypothesis  
9 relating anti-islet cell autoimmunity to the dietary impact on microbial communities and  
10 butyrate production. *Microbiome* 2016;4:17.

11  
12 <sup>18</sup> Vaarala O. Gut microbiota and type 1 diabetes. *Rev Diabet Stud* 2012;9:251-9.

13  
14 <sup>19</sup> Badami E, Sorini C, Coccia M, et al. Defective differentiation of regulatory FoxP3+ T cells  
15 by small-intestinal dendritic cells in patients with type 1 diabetes. *Diabetes* 2011;60:2120-4.

16  
17 <sup>20</sup> Gulden E, Wong FS, Wen L. The gut microbiota and Type 1 Diabetes. *Clin Immunol*  
18  
19 2015;159:143-53.

20  
21 <sup>21</sup> Hill C, Guarner F, Reid G, et al. Expert consensus document. The International Scientific  
22 Association for Probiotics and Prebiotics consensus statement on the scope and appropriate  
23 use of the term probiotic. *Nat Rev Gastroenterol Hepatol* 2014;11:506-14.

24  
25 <sup>22</sup> King C, Sarvetnick N. The incidence of type-1 diabetes in NOD mice is modulated by  
26 restricted flora not germ-free conditions *PLoS One* 2011;6:e17049.

27  
28 <sup>23</sup> Atkinson MA, Chervonsky A. Does the gut microbiota have a role in type 1 diabetes? Early  
29 evidence from humans and animal models of the disease. *Diabetologia* 2012;55:2868-77.

30  
31 <sup>24</sup> Valladares R, Sankar D, Li N, et al. *Lactobacillus johnsonii* N6.2 mitigates the  
32 development of type 1 diabetes in BB-DP rats. *PLoS One* 2010;5(5):e10507.

33  
34 <sup>25</sup> Kriegel MA, Sefik E, Hill JA, et al. Naturally transmitted segmented filamentous bacteria  
35 segregate with diabetes protection in nonobese diabetic mice. *Proc Natl Acad Sci U S A*  
36  
37 2011;108:11548-53.

38  
39 <sup>26</sup> Uusitalo U, Liu X, Yang J, et al. Association of Early Exposure of Probiotics and Islet  
40 Autoimmunity in the TEDDY Study. *JAMA Pediatr* 2015;9:1-9.

41  
42 <sup>27</sup> <http://www.accessdata.fda.gov/scripts/fdcc/?set=GRASNotices> (accessed 31 March 2017).

43  
44 <sup>28</sup> <http://www.efsa.europa.eu/en/topics/topic/qps.htm> (accessed 31 March 2017).

45  
46 <sup>29</sup> Laitinen K, Poussa T, Isolauri E. Nutrition, Allergy, Mucosal Immunology and Intestinal  
47 Microbiota Group. Probiotics and dietary counselling contribute to glucose regulation during  
48 and after pregnancy: a randomised controlled trial. *Br J Nutr* 2009;101:1679-87.

49  
50 <sup>30</sup> Luoto R, Laitinen K, Nermes M, et al. Impact of maternal probiotic-supplemented dietary  
51 counselling on pregnancy outcome and prenatal and postnatal growth: a double-blind,  
52 placebo-controlled study. *Br J Nutr* 2010;103:1792-9.

53  
54 <sup>31</sup> Craig ME, Jefferies C, Dabelea D, et al. Definition, epidemiology, and classification of  
55  
56  
57  
58  
59  
60



1  
2  
3  
4 diabetes in children and adolescents. *Pediatric Diabetes* 2014; 15 (Suppl. 20): 4–17.

5  
6 <sup>32</sup> Castro M. Placebo versus best-available-therapy control group in clinical trials for  
7 pharmacologic therapies which is better? *Proc Am Thorac Soc* 2007;4:570–3.

8  
9 <sup>33</sup> Husby S, Koletzko S, Korponay-Szabó IR et al. European Society for Pediatric  
10 Gastroenterology, Hepatology, and Nutrition guidelines for the diagnosis of coeliac disease. *J*  
11 *Pediatr Gastroenterol Nutr* 2012;54(1):136-60. Erratum in: *J Pediatr Gastroenterol Nutr*  
12 2012;54:572

13  
14  
15 <sup>34</sup> <http://www.who.int/growthref/en/> (accessed 31 March 2017).

16  
17 <sup>35</sup> Greenbaum CJ, Mandrup-Poulsen T, McGee PF, et al. Mixed-meal tolerance test versus  
18 glucagon stimulation test for the assessment of beta-cell function in therapeutic trials in type 1  
19 diabetes. *Diabetes Care* 2008;31:1966–71.

20  
21  
22 <sup>36</sup> Lachin JM, McGee PL, Greenbaum CJ et al. Sample size requirements for studies of  
23 treatment effects on beta-cell function in newly diagnosed type 1 diabetes. *PLoS One*  
24 2011;6:e26471.  
25  
26  
27  
28  
29  
30  
31  
32  
33  
34  
35  
36  
37  
38  
39  
40  
41  
42  
43  
44  
45  
46  
47  
48  
49  
50  
51  
52  
53  
54  
55  
56  
57  
58  
59  
60

Table 1 Timetable of activities planned during the study.

| Time point                                                                  | Study period |           |            |                     |                       |                       |                        |
|-----------------------------------------------------------------------------|--------------|-----------|------------|---------------------|-----------------------|-----------------------|------------------------|
|                                                                             | T1D onset    | Enrolment | Allocation | Post-allocation     |                       |                       | Close-out              |
|                                                                             | - 60 days    | 0         | 0          | Day 1 <sup>st</sup> | Month 3 <sup>rd</sup> | Month 6 <sup>th</sup> | Month 12 <sup>th</sup> |
| <b>Enrolment:</b>                                                           |              |           |            |                     |                       |                       |                        |
| Eligibility screen                                                          |              | +         |            |                     |                       |                       |                        |
| Informed consent                                                            |              | +         |            |                     |                       |                       |                        |
| Allocation                                                                  |              |           | +          |                     |                       |                       |                        |
| <b>Interventions:</b>                                                       |              |           |            |                     |                       |                       |                        |
| Lactobacillus rhamnosus GG and Bifidobacterium lactis Bb12                  |              |           |            | ←                   | →                     |                       |                        |
| Placebo                                                                     |              |           |            | ←                   | →                     |                       |                        |
| <b>Assessments:</b>                                                         |              |           |            |                     |                       |                       |                        |
| Anthropometric measurement (body weight and height; BMI)                    |              |           | +          |                     | +                     | +                     | +                      |
| Fasting C-peptide                                                           | +            |           |            |                     |                       |                       |                        |
| GADA, IA2A, ICA                                                             | +            |           |            |                     |                       | +                     | +                      |
| Total IgA                                                                   | +            |           |            |                     |                       |                       |                        |
| TTGA                                                                        | +            |           |            |                     |                       |                       | +                      |
| Anti-Tg, anti-TPO, TSH, fT4                                                 | +            |           |            |                     |                       |                       | +                      |
| HbA1c                                                                       | +            |           | +          |                     | +                     | +                     | +                      |
| Interleukins: IL-1, IL-2, IL-10, TNF- $\alpha$ , IFN- $\gamma$              | +            |           |            |                     |                       | +                     | +                      |
| C-peptide during mixed-meal test                                            |              |           | +          |                     |                       |                       | +                      |
| Side effects (abdominal pain, diarrhea, constipation, vomiting, flatulence) |              |           |            |                     | +                     | +                     | +                      |
| Severe hypoglycemia, ketoacidosis                                           |              |           |            |                     | +                     | +                     | +                      |
| Return of non-used study products                                           |              |           |            |                     |                       | +                     |                        |

1  
2  
3  
4  
5  
6  
7  
8  
9  
10  
11  
12  
13  
14  
15  
16  
17  
18  
19  
20  
21  
22  
23  
24  
25  
26  
27  
28  
29  
30  
31  
32  
33  
34  
35  
36  
37  
38  
39  
40  
41  
42  
43  
44  
45  
46  
47  
48  
49

BMI: body mass index; HbA1c: glycated hemoglobin; IL-1: interleukin-1; IL-2: interleukin-2; IL-10: interleukin-10; TNF- $\alpha$ : tumor necrosis factor alpha; IFN- $\gamma$ : interferon gamma; anti-Tg: antithyroglobulin antibody; anti-TPO: anti-thyroid peroxidase antibodies; TSH: thyroid - stimulating hormone; fT4: free thyroxine; TTGA: tissue transglutaminase antibody; IgA: immunoglobulin A; ICA: islet cell cytoplasmic autoantibodies; GADA: glutamic acid decarboxylase autoantibodies; IA2A: tyrosine phosphatase autoantibodies

For peer review only

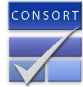

## CONSORT 2010 checklist of information to include when reporting a randomised trial\*

| Section/Topic                    | Item No | Checklist item                                                                                                                                                                              | Reported on page No |
|----------------------------------|---------|---------------------------------------------------------------------------------------------------------------------------------------------------------------------------------------------|---------------------|
| <b>Title and abstract</b>        |         |                                                                                                                                                                                             |                     |
|                                  | 1a      | Identification as a randomised trial in the title                                                                                                                                           | 1                   |
|                                  | 1b      | Structured summary of trial design, methods, results, and conclusions (for specific guidance see CONSORT for abstracts)                                                                     | 1                   |
| <b>Introduction</b>              |         |                                                                                                                                                                                             |                     |
| Background and objectives        | 2a      | Scientific background and explanation of rationale                                                                                                                                          | 4-6                 |
|                                  | 2b      | Specific objectives or hypotheses                                                                                                                                                           | 6                   |
| <b>Methods</b>                   |         |                                                                                                                                                                                             |                     |
| Trial design                     | 3a      | Description of trial design (such as parallel, factorial) including allocation ratio                                                                                                        | 6                   |
|                                  | 3b      | Important changes to methods after trial commencement (such as eligibility criteria), with reasons                                                                                          |                     |
| Participants                     | 4a      | Eligibility criteria for participants                                                                                                                                                       | 7                   |
|                                  | 4b      | Settings and locations where the data were collected                                                                                                                                        | 6                   |
| Interventions                    | 5       | The interventions for each group with sufficient details to allow replication, including how and when they were actually administered                                                       | 7                   |
| Outcomes                         | 6a      | Completely defined pre-specified primary and secondary outcome measures, including how and when they were assessed                                                                          | 9                   |
|                                  | 6b      | Any changes to trial outcomes after the trial commenced, with reasons                                                                                                                       |                     |
| Sample size                      | 7a      | How sample size was determined                                                                                                                                                              | 10                  |
|                                  | 7b      | When applicable, explanation of any interim analyses and stopping guidelines                                                                                                                |                     |
| <b>Randomisation:</b>            |         |                                                                                                                                                                                             |                     |
| Sequence generation              | 8a      | Method used to generate the random allocation sequence                                                                                                                                      | 10                  |
|                                  | 8b      | Type of randomisation; details of any restriction (such as blocking and block size)                                                                                                         | 10                  |
| Allocation concealment mechanism | 9       | Mechanism used to implement the random allocation sequence (such as sequentially numbered containers), describing any steps taken to conceal the sequence until interventions were assigned | 10                  |
| Implementation                   | 10      | Who generated the random allocation sequence, who enrolled participants, and who assigned participants to interventions                                                                     | 10                  |
| Blinding                         | 11a     | If done, who was blinded after assignment to interventions (for example, participants, care providers, those                                                                                | 10                  |

|    |                          |                                                                                                                     |      |
|----|--------------------------|---------------------------------------------------------------------------------------------------------------------|------|
| 1  |                          |                                                                                                                     |      |
| 2  |                          | assessing outcomes) and how                                                                                         |      |
| 3  |                          |                                                                                                                     |      |
| 4  |                          | 11b If relevant, description of the similarity of interventions                                                     |      |
| 5  | Statistical methods      | 12a Statistical methods used to compare groups for primary and secondary outcomes                                   | 11   |
| 6  |                          | 12b Methods for additional analyses, such as subgroup analyses and adjusted analyses                                |      |
| 7  |                          |                                                                                                                     |      |
| 8  | <b>Results</b>           |                                                                                                                     |      |
| 9  | Participant flow (a      | 13a For each group, the numbers of participants who were randomly assigned, received intended treatment, and        |      |
| 10 | diagram is strongly      | were analysed for the primary outcome                                                                               |      |
| 11 | recommended)             | 13b For each group, losses and exclusions after randomisation, together with reasons                                |      |
| 12 | Recruitment              | 14a Dates defining the periods of recruitment and follow-up                                                         |      |
| 13 |                          | 14b Why the trial ended or was stopped                                                                              |      |
| 14 |                          |                                                                                                                     |      |
| 15 | Baseline data            | 15 A table showing baseline demographic and clinical characteristics for each group                                 |      |
| 16 | Numbers analysed         | 16 For each group, number of participants (denominator) included in each analysis and whether the analysis was      |      |
| 17 |                          | by original assigned groups                                                                                         |      |
| 18 |                          |                                                                                                                     |      |
| 19 | Outcomes and             | 17a For each primary and secondary outcome, results for each group, and the estimated effect size and its           |      |
| 20 | estimation               | precision (such as 95% confidence interval)                                                                         |      |
| 21 |                          | 17b For binary outcomes, presentation of both absolute and relative effect sizes is recommended                     |      |
| 22 | Ancillary analyses       | 18 Results of any other analyses performed, including subgroup analyses and adjusted analyses, distinguishing       |      |
| 23 |                          | pre-specified from exploratory                                                                                      |      |
| 24 |                          |                                                                                                                     |      |
| 25 | Harms                    | 19 All important harms or unintended effects in each group (for specific guidance see CONSORT for harms)            | 11   |
| 26 |                          |                                                                                                                     |      |
| 27 | <b>Discussion</b>        |                                                                                                                     |      |
| 28 | Limitations              | 20 Trial limitations, addressing sources of potential bias, imprecision, and, if relevant, multiplicity of analyses |      |
| 29 | Generalisability         | 21 Generalisability (external validity, applicability) of the trial findings                                        |      |
| 30 | Interpretation           | 22 Interpretation consistent with results, balancing benefits and harms, and considering other relevant evidence    |      |
| 31 |                          |                                                                                                                     |      |
| 32 | <b>Other information</b> |                                                                                                                     |      |
| 33 | Registration             | 23 Registration number and name of trial registry                                                                   | 2    |
| 34 | Protocol                 | 24 Where the full trial protocol can be accessed, if available                                                      | 2    |
| 35 | Funding                  | 25 Sources of funding and other support (such as supply of drugs), role of funders                                  | 7,12 |
| 36 |                          |                                                                                                                     |      |

37

38 \*We strongly recommend reading this statement in conjunction with the CONSORT 2010 Explanation and Elaboration for important clarifications on all the items. If relevant, we also

39 recommend reading CONSORT extensions for cluster randomised trials, non-inferiority and equivalence trials, non-pharmacological treatments, herbal interventions, and pragmatic trials.

40 Additional extensions are forthcoming: for those and for up to date references relevant to this checklist, see [www.consort-statement.org](http://www.consort-statement.org).

41

42

# BMJ Open

## Effects of *Lactobacillus rhamnosus* GG and *Bifidobacterium lactis* Bb12 on beta-cell function in children with newly diagnosed type 1 diabetes: protocol of a randomised controlled trial.

|                                 |                                                                                                                                                                                                                                                                                |
|---------------------------------|--------------------------------------------------------------------------------------------------------------------------------------------------------------------------------------------------------------------------------------------------------------------------------|
| Journal:                        | <i>BMJ Open</i>                                                                                                                                                                                                                                                                |
| Manuscript ID                   | bmjopen-2017-017178.R1                                                                                                                                                                                                                                                         |
| Article Type:                   | Protocol                                                                                                                                                                                                                                                                       |
| Date Submitted by the Author:   | 11-Jul-2017                                                                                                                                                                                                                                                                    |
| Complete List of Authors:       | Groele, Lidia; Warszawski Uniwersytet Medyczny 1 Wydział Lekarski, Department of Paediatrics<br>SZAJEWSKA, Hania; The Medical University of Warsaw, Dept of Paediatrics<br>Szybowska, Agnieszka; Warszawski Uniwersytet Medyczny 1 Wydział Lekarski, Department of Paediatrics |
| <b>Primary Subject Heading</b>: | Diabetes and endocrinology                                                                                                                                                                                                                                                     |
| Secondary Subject Heading:      | Paediatrics                                                                                                                                                                                                                                                                    |
| Keywords:                       | probiotics, microbiota, children, RCT                                                                                                                                                                                                                                          |
|                                 |                                                                                                                                                                                                                                                                                |

SCHOLARONE™  
Manuscripts

1  
2  
3 **Effects of *Lactobacillus rhamnosus* GG and *Bifidobacterium lactis* Bb12 on beta-cell**  
4 **function in children with newly diagnosed type 1 diabetes: protocol of a randomised**  
5 **controlled trial.**  
6

7 Lidia Groele, Hania Szajewska, Agnieszka Szypowska

8 The Medical University of Warsaw, Department of Paediatrics, Warsaw, Poland  
9

10  
11  
12 **Corresponding author:**

13 Agnieszka Szypowska, MD, PhD, Assoc Prof

14 Department of Paediatrics, The Medical University of Warsaw

15 Żwirki i Wigury 63A, 02-091 Warsaw, Poland,

16 email: agnieszka.szypowska@gmail.com  
17  
18  
19  
20  
21  
22

23 **Date and protocol version identifier:** 30/06/2017

24 **Key words:** probiotics, microbiota, children, RCT

25 **Word count:** 4765  
26  
27  
28  
29  
30  
31  
32  
33  
34  
35  
36  
37  
38  
39  
40  
41  
42  
43  
44  
45  
46  
47  
48  
49  
50  
51  
52  
53  
54  
55  
56  
57  
58  
59  
60

**ABSTRACT**

**Introduction.** Recent evidence has demonstrated that, among other factors, dysbiosis (imbalances in the composition and function of the gut microbiota) may be relevant in the development of type 1 diabetes (T1D). Thus, gut microbiota may be a target for improving outcomes in subjects with T1D. The aim of the study is to examine the effects of *Lactobacillus rhamnosus* GG and *Bifidobacterium lactis* Bb12 on beta-cell function in children with newly diagnosed T1D.

**Methods and analysis:** A total of 96 children aged 8 to 17 years with newly diagnosed T1D, confirmed by clinical history and the presence of at least one positive autoantibody, will be enrolled in a double-blind, randomised, placebo-controlled trial in which they will receive *Lactobacillus rhamnosus* GG and *Bifidobacterium lactis* Bb12 at a dose of  $10^9$  colony-forming units or an identically appearing placebo, orally, once daily, for 6 months. The follow-up will be for 12 months. The primary outcome measures will be the area under the curve of the C-peptide level during 2-h responses to a mixed meal.

**Ethics and dissemination:** The Bioethics Committee approved the study protocol. The findings of this trial will be submitted to a peer-reviewed paediatric journal. Abstracts will be submitted to relevant national and international conferences.

**Trial registration number:** The study protocol is under registration at ClinicalTrials.gov. NCT03032354



**Strengths and limitations of this study**

- The study design (randomised controlled trial, RCT) is the most robust methodology to assess the effectiveness of therapeutic interventions.
- The findings of this RCT, whether positive or negative, will contribute to the formulation of further recommendations on the use of *Lactobacillus rhamnosus* GG and *Bifidobacterium lactis* Bb12 for improving beta-cell function in children with newly diagnosed type 1 diabetes (T1D).
- It remains unclear which probiotics, alone or in combination, and at which doses, are potentially the most useful for management of T1D.

## INTRODUCTION

### *Type 1 diabetes*

Type 1 diabetes (T1D) involves the autoimmune destruction of the insulin-secreting pancreatic islets of Langerhans, leading to insulin deficiency.<sup>1,2</sup> The prevalence of T1D varies considerably geographically,<sup>3</sup> but in many regions it is rising.<sup>4</sup> The pathophysiology is multifactorial. In addition to genetic background, a number of environmental factors have been claimed to influence the T1D epidemiology, including the mode of birth, early infant diet (e.g., lack of breastfeeding, early introduction of cow's milk, gluten), viral infections, and antibiotic use.<sup>5,6,7</sup> Recent evidence has demonstrated that dysbiosis, defined as imbalances in the composition and function of the gut microbiota, also may be relevant.

### *Gut microbiota & type 1 diabetes*

Current studies suggest that the interaction between gut microbiota and the immune system may be a major factor influencing T1D development. Alterations in gut microbiota composition observed in T1D patients would increase gut permeability. Microbes, microbial metabolites, bacterial products, and the immune responses to them may promote inflammation and induce an alteration in intestinal barrier function. If so, that facilitates greater exposure to the immune system of dietary antigens and microbiota-derived products, which may cause a proinflammatory response and stimulate beta-cell autoimmunity in genetically predisposed subjects.<sup>8</sup>

Compared to healthy controls, subjects with T1D exhibit a less diverse and less stable gut microbiota.<sup>9,10,11,12,13</sup> A low abundance of lactate- and butyrate-producing species has been noted in children with T1D.<sup>14</sup> Butyrate is the main energy source for colonic epithelial cells. It induces mucin synthesis and increases the barrier mechanisms of tight junctions. It also decreases bacterial transport across the gut epithelium.<sup>15,16</sup> Adequate butyrate production is essential for gut integrity and may have a protective effect on the development of anti-islet cell autoantibodies.<sup>17</sup>

It seems that the diabetic gut is underequipped with bacteria that promote protective immune mechanisms.<sup>18</sup> In children with beta-cell autoimmunity, a significant decrease in the numbers of *Lactobacillus* and *Bifidobacterium* was observed.<sup>11</sup> These are the major genera of bacteria that make up the colon flora in humans, constitute intestinal microbial homeostasis, inhibit growth of pathogens, improve the gut mucosal barrier, and modulate local and systemic

1  
2  
3 immune responses. Dysbiosis causes changes in the local immune systems of T1D patients  
4 demonstrated, for example, by the low expression of FOXP3 and impaired induction of  
5 FOXP3-positive regulatory T cells by small intestinal dendritic cells.<sup>19</sup>  
6  
7

8  
9  
10 For a detailed review of studies evaluating the role of the gut microbiota in these patients, see  
11 the review by *Gulden et al.*<sup>20</sup>  
12

### 13 14 *Microbiota modulation strategies*

15  
16 With the growing recognition of the role of gut microbiota in health and disease, it has  
17 become clear that gut microbiota may be a target for improving outcomes in subjects affected  
18 by or at risk for certain diseases, including T1D. To date, modification of the gut microbiota  
19 via the provision of probiotics (defined as live microorganisms that, when administered in  
20 adequate amounts, confer a health benefit on the host)<sup>21</sup> is the most extensively studied  
21 strategy. In humans, by far, the most commonly used probiotics are bacteria from the genus  
22 *Lactobacillus* or *Bifidobacterium*.  
23  
24  
25  
26  
27

28  
29 Data on the effects of probiotics in subjects with T1D are very limited. However, preliminary  
30 data are promising. In animals, studies using non-obese diabetic (NOD) mice or a rat model  
31 showed that the development of T1D can be prevented or delayed through modulation of the  
32 intestinal microbiota.<sup>22,23</sup> Administration of *Lactobacillus johnsoni* N6.2, isolated from  
33 BioBreeding diabetes-resistant rats, delays or inhibits the onset of T1D in BioBreeding  
34 diabetes-prone rats. Transmission of segmented filamentous bacteria to the NOD mouse  
35 correlates with disease prevention and the upregulation of Th17 cells in the intestine.<sup>24,25</sup>  
36  
37  
38  
39  
40  
41

42  
43 In humans, one, recent, prospective, cohort study, which was carried out as part of the  
44 TEDDY (The Environmental Determinants of Diabetes in the Young) study, aimed to  
45 examine the association between early probiotic exposure and islet autoimmunity (positive  
46 antibodies to insulin, glutamic acid decarboxylase, or insulinoma antigen 2 on at least two  
47 consecutive visits) in children genetically at increased risk for T1D. This study found that  
48 early (i.e., during the first 27 days of life) administration of probiotics (mainly  
49 *Lactobacillus* and *Bifidobacterium*, given either as a supplement or in infant formula  
50 supplemented with probiotics) may be associated with a reduced risk of islet autoimmunity  
51 [hazard ratio (HR) 0.66, 95% confidence interval (CI) 0.46–0.94], especially in children with  
52 the highest-risk HLA genotype of DR3/4 (HR 0.4, 95% CI 0.21–0.74). Of note, no reduction  
53  
54  
55  
56  
57  
58  
59  
60

1  
2  
3 was seen in children with moderately higher-risk genotypes (HR 0.97, 95% CI 0.62–1.54).<sup>26</sup>  
4  
5 Further studies to confirm this association are needed.  
6  
7

### 8 *Lactobacillus rhamnosus* GG and *Bifidobacterium lactis* B12

9  
10 These are among the world's best-studied probiotics. In the US, both have received a  
11 Generally Recognised As Safe (GRAS) status by the Food and Drug Administration.<sup>27</sup> In  
12 Europe, both have been granted Qualified Presumption of Safety (QPS) status by the  
13 European Food Safety Authority (EFSA) - a status granted on a species level.<sup>28</sup> Previous  
14 studies found that supplementation with *Lactobacillus rhamnosus* GG (*L rhamnosus* GG) and  
15 *Bifidobacterium lactis* Bb12 (*B lactis* Bb12) improved blood glucose control in  
16 normoglycaemic pregnant women and reduced the frequency of gestational diabetes  
17 mellitus,<sup>29,30</sup> thus, suggesting a role for these probiotics in glucose control.  
18  
19  
20  
21  
22  
23

## 24 **TRIAL OBJECTIVES AND HYPOTHESIS**

25  
26 The aim of the study is to examine the effects of *L rhamnosus* GG and *B lactis* Bb12 on beta-  
27 cell function in children with newly diagnosed T1D. We hypothesise that gut microbiota  
28 modulation with the combination of these two probiotics may be used as a tool to modulate  
29 the immune system for preventing islet cell destruction. We also speculate that children who  
30 receive *L rhamnosus* GG and *B lactis* Bb12 at the recognition of T1D will have more  
31 preserved beta-cell function than children who receive placebo.  
32  
33  
34  
35  
36

## 37 **METHODS**

### 38 *Trial design*

39  
40 This study is designed as a randomised, double-blind, placebo-controlled trial with allocation  
41 of 1:1. The trial was registered at the ClinicaTrials.gov (NCT03032354) prior to the inclusion  
42 of the first patient. Any important changes in the protocol will be implemented there.  
43  
44  
45  
46

### 47 *Settings and participants*

48  
49 Recruitment will be through the paediatric diabetes outpatient clinics at two participating  
50 centres in Warsaw, Poland (Department of Paediatrics, the Medical University of Warsaw and  
51 Department of Endocrinology and Diabetology, Children's Memorial Health Institute). Both  
52 are tertiary care hospitals that provide annually diabetes care to more than 200 children with  
53 newly recognised T1D. The personnel are adequately trained and competent in conducting  
54  
55  
56  
57  
58  
59  
60

1  
2  
3 clinical trials. The start of the recruitment is planned in July 2017 and should be completed  
4 within the following 1 year.  
5  
6

### 7 8 *Eligibility criteria*

9 Eligible children must fulfil all of the following inclusion criteria:

- 10 • T1D as defined by ISPAD criteria<sup>31</sup>, diagnosed within 60 days;
- 11 • Presence of at least one positive autoantibody [autoantibodies to glutamic acid  
12 decarboxylase (GAD), the tyrosine phosphatase-related insulinoma-associated 2 molecule  
13 (anti-IA-2), islet-cell antibodies (ICA)];
- 14 • Age 8-17 years
- 15 • Single fasting C-peptide level  $\geq 0.4$ ng/ml
- 16 • Written informed consent signed by parents (and patients if older than 16 years).

17  
18  
19  
20  
21  
22  
23 Subjects will be excluded for the following reasons:

- 24 • Antibiotic treatment within 2 months prior to enrolment
- 25 • Use of probiotics within 2 weeks prior to enrolment
- 26 • Gastrointestinal infection within 2 weeks prior to enrolment
- 27 • Chronic gastrointestinal diseases (e.g., inflammatory bowel disease, coeliac disease, food  
28 allergy)
- 29 • Immunodeficiency

### 30 31 32 33 34 35 36 37 38 *Interventions*

39 The intervention will be administration of a combination of two probiotics: *L rhamnosus* GG  
40 (strain deposit number ATCC 53103) and *B lactis* Bb12 (strain deposit number DSM15954).  
41 A placebo comparator was chosen as the gold standard for testing the efficacy of a new  
42 treatment.<sup>32</sup> The placebo will contain maltodextrin, and its taste and appearance will be  
43 identical to those of the active product. The study products will be manufactured in capsules  
44 and supplied free of charge by Chr. Hansen Holding A/S, Denmark. The manufacturer will  
45 have no role in the conception, protocol development, design, or conduct of the study, or in  
46 the analysis or interpretation of the data.  
47  
48  
49  
50  
51  
52  
53

### 54 55 *Study procedure*

56 The study procedures are described in Table 1. Patients and parents/caregivers will receive  
57 oral and written information regarding the study during their regular diabetes outpatient clinic  
58  
59  
60

1  
2  
3 visits within 60 days after T1D recognition. Written informed consent, signed by the legal  
4 caregivers and/or the patients, will be obtained by a physician involved in the study.  
5  
6

7  
8 Participants will be randomly assigned to two groups, receiving either *L rhamnosus* GG and *B*  
9 *lactis* Bb12 at a dose of  $10^9$  colony-forming units (CFU) or placebo, orally, once daily, for 6  
10 months. All study participants will be followed up for up to 12 months after the start of the  
11 intervention. Study visits at month 3, 6, and 12 will be coordinated with diabetes outpatient  
12 clinic visits.  
13  
14  
15

16  
17  
18 During the hospitalisation at diabetes recognition, a blood sample will be obtained for the  
19 measurement of fasting C-peptide, anti-GAD, anti-IA-2, ICA (analysed by radiobinding  
20 assays), and glycated haemoglobin (HbA1c) levels (performed by high-performance liquid  
21 chromatography). As T1D is frequently associated with autoimmune thyroid disease, anti-  
22 thyroid peroxidase (anti-TPO), anti-thyroglobulin (anti-Tg), serum thyroid-stimulating  
23 hormone (TSH), and free thyroxine (fT4) will be assessed (by chemiluminescence method) at  
24 diabetes onset and at month 12. Similarly, as T1D is associated with coeliac disease, all  
25 subjects will be tested for anti-tissue transglutaminase type 2 (anti-TG2) antibodies (analyzed  
26 by Elisa test) and/or endomysial antibodies (EMA) (performed by indirect  
27 immunofluorescence method) at diabetes recognition and at month 12. In addition, at diabetes  
28 onset, total serum IgA will be measured (by nephelometric analysis) to exclude IgA  
29 deficiency. In the case of IgA deficiency, the same type of antibodies in the IgG class will be  
30 analysed. In the case of positive serology, a small-intestine biopsy will be considered to  
31 confirm the diagnosis of coeliac disease in line with current European guidelines.<sup>33</sup>  
32 Interleukins as inflammatory markers will be compared (by Elisa tests) between groups at  
33 diabetes onset and month 6 and 12.  
34  
35  
36  
37  
38  
39  
40  
41  
42  
43  
44  
45

46 At study entry and at all study visits, all eligible children will undergo a physical examination,  
47 including evaluation of anthropometric measurements (weight, height, and body mass index  
48 [BMI]), which will be plotted on WHO 2007 growth curves<sup>34</sup>). The participants also will be  
49 stratified accordingly to Tanner developmental stage  $\leq 3$  or  $>3$ , as assessed by physical  
50 examination. All information regarding treatment modality (e.g., pump, infusion) and  
51 antibiotic use will be collected at these visits. Children will be treated with continuous  
52 subcutaneous insulin infusion or multiple daily injections. The total daily insulin dose and  
53  
54  
55  
56  
57  
58  
59  
60

1  
2  
3 basal insulin will be downloaded from insulin pumps or will be collected from patients'  
4 diaries.  
5  
6

7  
8 In our study, we chose to use the mixed-meal tolerance test (MMTT), as it is widely regarded  
9 as the gold standard for measuring endogenous insulin production among patients with type 1  
10 diabetes.<sup>35</sup> The MMTT will be performed three times: at allocation and at months 6 and 12.  
11 For the MMTT, all eligible participants will consume a standard, mixed meal [liquid-meal  
12 BOOST test (6 mL/kg max 360 ml, Nestle S.A>, Vevey, Switzerland; 237 ml contains 41 g  
13 carbohydrates, 10 g protein, 4 g fat, energy value 240 kcal)]. The C-peptide levels will be  
14 measured in blood samples drawn every 30 minutes for 2 hours after the mixed meal  
15 consumption. The MMTT will be initiated before 10 a.m. with children in the fasting state.  
16 Children treated with an insulin pump will continue use of this pump at the usual basal rate. A  
17 long-acting insulin analogue (glargine or detemir) will be given in the evening of the previous  
18 day. The MMTT will be rescheduled if a child has a capillary glucose value >180 mg/dl or  
19 <70 mg/dl (>10 mmol/l or <3.9 mmol/l).  
20

21 Gut permeability will be measured using zonulin, a biomarker of impaired gut barrier  
22 function, via ELISA (enzyme-linked immunosorbent assay), at months 6 and 12 of the  
23 study.<sup>36</sup>  
24  
25

26 Compliance will be assessed by collecting empty packages and the remainder of the product  
27 that was not used as well as by direct interview with the patient and/or caregiver. Participants  
28 receiving <75% of the recommended doses will be considered as non-compliant.  
29  
30

31 At any point of time, caregivers will have the right to withdraw the participating child from  
32 the study without giving the reason for discontinuation. There will be no effect of this  
33 discontinuation on subsequent physician and/or institutional medical care.  
34  
35

### 36 *End points*

#### 37 *Primary*

- 38 • Area under the curve of the C-peptide level (AUC CP) during 2-h responses to a mixed  
39 meal.  
40

#### 41 *Secondary*

- 42 • Fasting C-peptide concentration  
43  
44  
45  
46  
47  
48  
49  
50  
51  
52  
53  
54  
55  
56  
57  
58  
59  
60



- Insulin requirement (U/kg body mass)
- HbA1c
- Interleukins: IL-1, IL-2, IL-10, TNF- $\alpha$ , IFN- $\gamma$
- Gut permeability
- Anthropometric parameters (weight, height, BMI z-score)
- Side effects (e.g., abdominal pain, diarrhoea, constipation, vomiting, flatulence)
- Occurrence of other autoimmune diseases (e.g., autoimmune thyroid disease, coeliac disease)
- Acute complications of T1D such as severe hypoglycaemia or ketoacidosis

#### *Participant timeline*

The time schedule for enrolment, interventions, assessment, and visits for the participants is described in Table 1.

#### *Sample size*

The sample size was calculated based on recommendations on sample size calculation to be used in studies on the effects of new agents on the 2-hour AUC of the C-peptide in MMTT in newly diagnosed T1D patients by Lachin.<sup>37</sup> A normalizing transformation  $\ln(x+1)$  for C-peptide AUC is planned to be used. Since there are no studies that have evaluated the use of probiotics in T1D patients, the study plans to detect a 50% increase in the (untransformed) 2-hour AUC of C-peptide values in MMTT at 12th month in the treated group relative to the placebo group. It is assumed that fractions of children in age groups 8-12 and 13-17 years of age are equal (50%). To provide 85% power using a one-sided test at the confidence level of 0.05, with 1:1 randomization and assuming a drop-out rate of 10%, a sample size of 96 subjects is needed (calculation based on mean and RMSE estimates 0.25 and 0.142, and 0.30 and 0.204 for age groups 8-12 years and 13-17 years, respectively).

#### *Randomisation*

The randomisation list, which is separate for each centre, will be generated using the statistical program StatsDirect by an independent person and will be kept by a staff member not involved in the trial. In order to obtain comparable groups, block randomisation will be



1  
2  
3 performed (each block will contain four patients: 2 in the intervention group and 2 in the  
4 control group).  
5  
6

### 7 8 *Blinding*

9 All participants and investigators will be blinded to the assigned treatment throughout the  
10 study. The products for both groups will be similar in terms of smell and colour and will be  
11 packed in identical packages. Researchers, caregivers, outcome assessors, and the person  
12 responsible for the statistical analysis will be blinded to the intervention until completion of  
13 the study.  
14  
15  
16  
17

### 18 19 *Allocation concealment*

20 The study products will be packaged and assigned consecutive numbers according to the  
21 randomisation list. Independent personnel not involved in the conduct of the trial will  
22 dispense the numbered study products.  
23  
24  
25  
26

### 27 28 *Data collection and management*

29 All study participants will be assigned a study identification number. Case report forms  
30 (CRFs) will be completed on paper forms. Data will then be entered and stored in a password-  
31 protected electronic database. The original paper copies of CRFs and all study data will be  
32 stored in a locker within the study site, accessible to the involved researchers only. Insulin  
33 requirements, HbA1c values, and anthropometric parameters will be collected from all  
34 participants who discontinue or deviate from the intervention protocols.  
35  
36  
37  
38  
39

### 40 41 *Monitoring*

42 An independent Data and Safety Monitoring Board (DSMB) will be set up prior to the start of  
43 the study. The DSMB will review data after recruitment of 25%, 50% and 75% participants to  
44 review the study progress and all adverse events.  
45  
46  
47  
48

### 49 50 **Statistical analysis**

51 All statistical analyses will be performed with the computer software StatsDirect.  
52 In the case of descriptive statistics for categorical variables, the number and percentage of  
53 occurrences will be reported. The distribution of continuous variables will be first evaluated  
54 using the Shapiro-Wilk test, then, in the case of variables with a normal distribution, the mean  
55 and standard deviation will be provided; if not, the median and the 25th and 75th percentile  
56  
57  
58  
59  
60

1  
2  
3 will be reported. For each variable, the number of missing data will be given. Categorical  
4 variables will be compared using the Fisher test or chi-squared test, as appropriate. Normally  
5 distributed variables will be compared using the Student's t-test; the Mann-Whitney test will  
6 be used for variables that are not normally distributed. If applicable, paired tests will be used.  
7  
8  
9

10  
11 In the analysis of primary endpoint, a pre-specified analysis of covariance (ANCOVA) model  
12 will be used; the change from baseline to the 12th month in the AUC of the C-peptide level  
13 will be used as the response variable, with study treatment and baseline AUC values as  
14 covariates. A normalizing transformation  $\ln(x+1)$  for the C-peptide AUC is planned to be  
15 used. In an additional exploratory analysis, the mixed-effect model for C-peptide AUC as a  
16 response variable will be built, with both random intercept and slope adjusting for treatment  
17 assignment, time (0, 6, and 12 months), baseline C-peptide AUC, age, gender, and Tanner  
18 developmental stage ( $\leq 3$  or  $> 3$ ).  
19  
20  
21  
22  
23  
24

25  
26 Similarly, in the analysis of secondary endpoints, a pre-specified ANCOVA model will be  
27 used; the change from baseline to the 12th month in HbA1c level, insulin dosage, fasting C-  
28 peptide concentration, interleukin levels, and gut permeability will be used as the response  
29 variables, with study treatment and the baseline AUC value as covariates. In an additional  
30 exploratory analysis, mixed-effect models for each of the above variables as response  
31 variables will be built, with both random intercept and slope adjusting for treatment  
32 assignment, time (0, 6, and 12 months), baseline values, age, gender, and Tanner  
33 developmental stage ( $\leq 3$  or  $> 3$ ).  
34  
35  
36  
37  
38  
39

40  
41 Moreover, for acute complications of T1D, the relative risk (RR) with 95% confidence  
42 interval (CI) and number needed to treat (NNT) will be calculated. For all models,  
43 coefficients with 95% CI and p-values will be reported. The 95% CI will be provided in  
44 descriptive statistics for changes in time for continuous variables.  
45  
46  
47  
48

49 Subgroup analysis will be conducted, and the Tanner developmental stage ( $\leq 3$  or  $> 3$ ) will be  
50 used to form the subgroups of the analyses.  
51  
52

53  
54 Missing data will not be replaced. Two-sided tests will be used for all hypotheses. The  
55 significance level will be set at 0.05. All analyses will be performed on the intention-to-treat  
56 basis (i.e., all participants are included in the arm to which they were allocated, whether or not  
57  
58  
59  
60

1  
2  
3 they received [or completed] the intervention given to that arm) and per-protocol analysis  
4 (i.e., an analysis of the subset of participants who complied with the protocol).  
5  
6

### 7 8 **Harms**

9  
10 Data on adverse events will be collected. All serious adverse events will be immediately  
11 reported to the project leader who will be responsible for notifying the Ethics Committee, all  
12 participating investigators, and the manufacturer of the study products.  
13

### 14 15 16 **Auditing**

17 The Ethics Committee did not require auditing for this study.  
18  
19

### 20 21 **Ethics and dissemination**

22 The study was approved by the Ethics Committee of the Medical University of Warsaw.  
23 Verbal and written information regarding informed consent will be presented to the caregivers  
24 and/or patients. Any modifications to the protocol that may affect the conduct of the study  
25 will be presented to the Committee. The full protocol will be available freely due to open  
26 access publication. checklist The findings of this RCT will be submitted to a peer-reviewed  
27 journal. Abstracts will be submitted to relevant national and international conferences. The  
28 standards from the guidelines of the Consolidated Standards of Reporting Trials (CONSORT)  
29 will be followed for this RCT.  
30  
31  
32  
33  
34  
35  
36  
37

38 **Contributorship statement:** AS conceptualised the study. LG developed the first draft of the  
39 manuscript. HS, AS, LG contributed to the development of the study protocol and approved  
40 the final draft of the manuscript.  
41  
42  
43

44 **Funding statement:** This study will be funded by grant RG 5/2016 provided by the Nutricia  
45 Foundation, 6 Bobrowiecka Street, 00-728 Warsaw, Poland, phone: +48 (0) 22 55 00 068 and  
46 the Polish Diabetes Association. M. Malecki M.D., Ph.D. Department of Metabolic Diseases  
47 Jagiellonian University, Medical College, 15 Kopernika Street, 31-501 Krakow, POLAND,  
48 phone: (00 48-12) 424-83-05. The funders will have no role in the conception, protocol  
49 development, design, or conduct of the study, or in the analysis or interpretation of the data.  
50  
51  
52  
53  
54  
55

56 **Competing interests statement:** The authors declare that they have no competing interests.  
57  
58  
59  
60

Table 1 Timetable of activities planned during the study.

|                                                                                    | Study period |           |            |                     |                       |                       |                        |
|------------------------------------------------------------------------------------|--------------|-----------|------------|---------------------|-----------------------|-----------------------|------------------------|
|                                                                                    | T1D onset    | Enrolment | Allocation | Post-allocation     |                       |                       | Close-out              |
| Time point                                                                         | - 60 days    | 0         | 0          | Day 1 <sup>st</sup> | Month 3 <sup>rd</sup> | Month 6 <sup>th</sup> | Month 12 <sup>th</sup> |
| <b>Enrolment:</b>                                                                  |              |           |            |                     |                       |                       |                        |
| Eligibility screen                                                                 |              | +         |            |                     |                       |                       |                        |
| Informed consent                                                                   |              | +         |            |                     |                       |                       |                        |
| Allocation                                                                         |              |           | +          |                     |                       |                       |                        |
| <b>Interventions:</b>                                                              |              |           |            |                     |                       |                       |                        |
| Lactobacillus rhamnosus GG and Bifidobacterium lactis Bb12                         |              |           |            | ←————→              |                       |                       |                        |
| Placebo                                                                            |              |           |            | ←————→              |                       |                       |                        |
| <b>Assessments:</b>                                                                |              |           |            |                     |                       |                       |                        |
| Anthropometric measurement (body weight and height; BMI; Tanner stage)             |              |           | +          |                     | +                     | +                     | +                      |
| Fasting C-peptide                                                                  | +            |           |            |                     |                       |                       |                        |
| GADA, IA2A, ICA                                                                    | +            |           |            |                     |                       | +                     | +                      |
| Total IgA                                                                          | +            |           |            |                     |                       |                       |                        |
| TTGA                                                                               | +            |           |            |                     |                       |                       | +                      |
| Anti-Tg, anti-TPO, TSH, fT4                                                        | +            |           |            |                     |                       |                       | +                      |
| HbA1c                                                                              | +            |           | +          |                     | +                     | +                     | +                      |
| Interleukins: IL-1, IL-2, IL-10, TNF- $\alpha$ , IFN- $\gamma$                     | +            |           |            |                     |                       | +                     | +                      |
| C-peptide during mixed-meal test                                                   |              |           | +          |                     |                       | +                     | +                      |
| Gut permeability                                                                   |              |           |            |                     |                       | +                     | +                      |
| Side effects (e.g., abdominal pain, diarrhoea, constipation, vomiting, flatulence) |              |           |            |                     | +                     | +                     | +                      |
| Severe hypoglycaemia, ketoacidosis                                                 |              |           |            |                     | +                     | +                     | +                      |
| Return of non-used study products                                                  |              |           |            |                     |                       | +                     |                        |

BMI: body mass index; HbA1c: glycated haemoglobin; IL-1: interleukin-1; IL-2: interleukin-2; IL-10: interleukin-10; TNF- $\alpha$ : tumor necrosis factor alpha; IFN- $\gamma$ : interferon gamma; anti-Tg: antithyroglobulin antibody; anti-TPO: anti-thyroid peroxidase antibodies; TSH: thyroid - stimulating hormone; fT4: free thyroxine; TTGA: tissue transglutaminase antibody; IgA:

immunoglobulin A; ICA: islet cell cytoplasmic autoantibodies; GADA: glutamic acid decarboxylase autoantibodies; IA2A: tyrosine phosphatase autoantibodies.

## REFERENCES

- <sup>1</sup> Atkinson MA, Eisenbarth GS, Michels AW. Type 1 diabetes. *Lancet* 2014;383:69-82.
- <sup>2</sup> American Diabetes Association. Standards of medical care in diabetes-2014. *Diab Care* 2014;Suppl.1:s14-s80.
- <sup>3</sup> Patterson CC, Dahlquist GG, Gyürüs E, et al. EURODIAB Study Group Incidence trends for childhood type 1 diabetes in Europe during 1989–2003 and predicted new cases 2005–20: a multicentre prospective registration study. *Lancet* 2009;373: 2027–33.
- <sup>4</sup> DIAMOND Project Group. Incidence and trends of childhood type 1 diabetes worldwide 1990–1999. *Diabet Med* 2006;23: 857–66.
- <sup>5</sup> Mejía-León ME, Petrosino JF, Ajami NJ, et al. Fecal microbiota imbalance in Mexican children with type 1 diabetes. *Sci Rep* 2014;4:3814.
- <sup>6</sup> Patelarou E, Girvalaki C, Brokalaki H, et al. Current evidence on the associations of breastfeeding, infant formula, and cow's milk introduction with type 1 diabetes mellitus: a systematic review. *Nutr Rev* 2012;70:509-19.
- <sup>7</sup> Knip M, Virtanen SM, Akerblom HK. Infant feeding and the risk of type 1 diabetes. *Am J Clin Nutr* 2010;91:1506–13.
- <sup>8</sup> Semenkovich CF, Danska J, Darsow T, et al. American Diabetes Association and JDRF Research symposium: diabetes and the microbiome. *Diabetes* 2015;64:3967-77.
- <sup>9</sup> Giongo A, Gano KA, Crabb DB et al. Toward defining the autoimmune microbiome for type 1 diabetes. *ISME J* 2011;5:82-91.
- <sup>10</sup> Brown CT, Davis-Richardson AG, Giongo A, et al. Gut microbiome metagenomics analysis suggests a functional model for the development of autoimmunity for type 1 diabetes. *PLoS One* 2011;6:e25792.
- <sup>11</sup> Murri M, Leiva I, Gomez-Zumaquero JM, et al. Gut microbiota in children with type 1 diabetes differs from that in healthy children: a case-control study. *BMC Med* 2013;11:46.
- <sup>12</sup> de Goffau MC, Luopajarvi K, Knip M ,et al. Fecal microbiota composition differs between children with  $\beta$ -cell autoimmunity and those without. *Diabetes* 2013;62:1238-44.
- <sup>13</sup> Endesfelder D, zu Castell W, Ardisson A, et al. Compromised gut microbiota networks in children with anti-islet cell autoimmunity. *Diabetes* 2014;63:2006–14.
- <sup>14</sup> Vaarala O. Human intestinal microbiota and type 1 diabetes. *Curr Diab Rep* 2013;13:601-7.

- 1  
2  
3  
4 <sup>15</sup> Hague A, Butt AJ, Paraskeva C. The role of butyrate in human colonic epithelial cells: an  
5 energy source or inducer of differentiation and apoptosis? *Proc Nutr Soc* 1996;55:937-43.
- 6  
7 <sup>16</sup> Peng L, Li ZR, Green RS, et al. Butyrate enhances the intestinal barrier by facilitating tight  
8 junction assembly via activation of AMP-activated protein kinase in Caco-2 cell monolayers.  
9 *J Nutr* 2009;139:1619-25.
- 10  
11  
12 <sup>17</sup> Endesfelder D, Engel M, Davis-Richardson AG, et al. Towards a functional hypothesis  
13 relating anti-islet cell autoimmunity to the dietary impact on microbial communities and  
14 butyrate production. *Microbiome* 2016;4:17.
- 15  
16  
17 <sup>18</sup> Vaarala O. Gut microbiota and type 1 diabetes. *Rev Diabet Stud* 2012;9:251-9.
- 18  
19 <sup>19</sup> Badami E, Sorini C, Coccia M, et al. Defective differentiation of regulatory FoxP3+ T cells  
20 by small-intestinal dendritic cells in patients with type 1 diabetes. *Diabetes* 2011;60:2120-4.
- 21  
22 <sup>20</sup> Gulden E, Wong FS, Wen L. The gut microbiota and Type 1 Diabetes. *Clin Immunol*  
23 2015;159:143-53.
- 24  
25  
26 <sup>21</sup> Hill C, Guarner F, Reid G, et al. Expert consensus document. The International Scientific  
27 Association for Probiotics and Prebiotics consensus statement on the scope and appropriate  
28 use of the term probiotic. *Nat Rev Gastroenterol Hepatol* 2014;11:506-14.
- 29  
30  
31 <sup>22</sup> King C, Sarvetnick N. The incidence of type-1 diabetes in NOD mice is modulated by  
32 restricted flora not germ-free conditions *PLoS One* 2011;6:e17049.
- 33  
34 <sup>23</sup> Atkinson MA, Chervonsky A. Does the gut microbiota have a role in type 1 diabetes? Early  
35 evidence from humans and animal models of the disease. *Diabetologia* 2012;55:2868-77.
- 36  
37 <sup>24</sup> Valladares R, Sankar D, Li N, et al. Lactobacillus johnsonii N6.2 mitigates the  
38 development of type 1 diabetes in BB-DP rats. *PLoS One* 2010;5(5):e10507.
- 39  
40  
41 <sup>25</sup> Kriegel MA, Sefik E, Hill JA, et al. Naturally transmitted segmented filamentous bacteria  
42 segregate with diabetes protection in nonobese diabetic mice. *Proc Natl Acad Sci U S A*  
43 2011;108:11548-53.
- 44  
45  
46 <sup>26</sup> Uusitalo U, Liu X, Yang J, et al. Association of Early Exposure of Probiotics and Islet  
47 Autoimmunity in the TEDDY Study. *JAMA Pediatr* 2015;9:1-9.
- 48  
49 <sup>27</sup> <http://www.accessdata.fda.gov/scripts/fdcc/?set=GRASNotices> (accessed 31 March 2017).
- 50  
51 <sup>28</sup> <http://www.efsa.europa.eu/en/topics/topic/qps.htm> (accessed 31 March 2017).
- 52  
53 <sup>29</sup> Laitinen K, Poussa T, Isolauri E. Nutrition, Allergy, Mucosal Immunology and Intestinal  
54 Microbiota Group. Probiotics and dietary counselling contribute to glucose regulation during  
55 and after pregnancy: a randomised controlled trial. *Br J Nutr* 2009;101:1679-87.
- 56  
57  
58  
59  
60

1  
2  
3  
4 <sup>30</sup> Luoto R, Laitinen K, Nermes M, et al. Impact of maternal probiotic-supplemented dietary  
5 counselling on pregnancy outcome and prenatal and postnatal growth: a double-blind,  
6 placebo-controlled study. *Br J Nutr* 2010;103:1792-9.

7  
8  
9 <sup>31</sup> Craig ME, Jefferies C, Dabelea D, et al. Definition, epidemiology, and classification of  
10 diabetes in children and adolescents. *Pediatric Diabetes* 2014; 15 (Suppl. 20): 4–17.

11  
12 <sup>32</sup> Castro M. Placebo versus best-available-therapy control group in clinical trials for  
13 pharmacologic therapies which is better? *Proc Am Thorac Soc* 2007;4:570–3.

14  
15 <sup>33</sup> Husby S, Koletzko S, Korponay-Szabó IR et al. European Society for Pediatric  
16 Gastroenterology, Hepatology, and Nutrition guidelines for the diagnosis of coeliac disease. *J*  
17 *Pediatr Gastroenterol Nutr* 2012;54(1):136-60. Erratum in: *J Pediatr Gastroenterol Nutr*  
18 2012;54:572

19  
20 <sup>34</sup> [http:// www.who.int/growthref/en/](http://www.who.int/growthref/en/) (accessed 31 March 2017).

21  
22  
23  
24 <sup>35</sup> Greenbaum CJ, Mandrup-Poulsen T, McGee PF, et al. Mixed-meal tolerance test versus  
25 glucagon stimulation test for the assessment of beta-cell function in therapeutic trials in type 1  
26 diabetes. *Diabetes Care* 2008;31:1966–71.

27  
28  
29  
30 <sup>36</sup> Esnafoglu E, Cirrik S, Ayyildiz SN et al. Increased Serum Zonulin Levels as an Intestinal  
31 Permeability Marker in Autistic Subjects. *The Journal of Pediatrics*, 2017 (available online  
32 11 May 2017).

33  
34  
35  
36 <sup>37</sup> Lachin JM, McGee PL, Greenbaum CJ et al. Sample size requirements for studies of  
37 treatment effects on beta-cell function in newly diagnosed type 1 diabetes. *PLoS One*  
38 2011;6:e26471.



SPIRIT 2013 Checklist: Recommended items to address in a clinical trial protocol and related documents\*

| Section/item                                       | Item No | Description                                                                                                                                                                                                                                                                              | Reported on page No |
|----------------------------------------------------|---------|------------------------------------------------------------------------------------------------------------------------------------------------------------------------------------------------------------------------------------------------------------------------------------------|---------------------|
| Administrative information                         |         |                                                                                                                                                                                                                                                                                          |                     |
| Title                                              | 1       | Descriptive title identifying the study design, population, interventions, and, if applicable, trial acronym                                                                                                                                                                             | 1                   |
| Trial registration                                 | 2a      | Trial identifier and registry name. If not yet registered, name of intended registry                                                                                                                                                                                                     | 2,6                 |
|                                                    | 2b      | All items from the World Health Organization Trial Registration Data Set                                                                                                                                                                                                                 | YES                 |
| Protocol version                                   | 3       | Date and version identifier                                                                                                                                                                                                                                                              | 1                   |
| Funding                                            | 4       | Sources and types of financial, material, and other support                                                                                                                                                                                                                              | 13                  |
| Roles and responsibilities                         | 5a      | Names, affiliations, and roles of protocol contributors                                                                                                                                                                                                                                  | 13                  |
|                                                    | 5b      | Name and contact information for the trial sponsor                                                                                                                                                                                                                                       | 13                  |
|                                                    | 5c      | Role of study sponsor and funders, if any, in study design; collection, management, analysis, and interpretation of data; writing of the report; and the decision to submit the report for publication, including whether they will have ultimate authority over any of these activities | 7, 13               |
|                                                    | 5d      | Composition, roles, and responsibilities of the coordinating centre, steering committee, endpoint adjudication committee, data management team, and other individuals or groups overseeing the trial, if applicable (see Item 21a for data monitoring committee)                         | N/A                 |
| Introduction                                       |         |                                                                                                                                                                                                                                                                                          |                     |
| Background and rationale                           | 6a      | Description of research question and justification for undertaking the trial, including summary of relevant studies (published and unpublished) examining benefits and harms for each intervention                                                                                       | 4-6                 |
|                                                    | 6b      | Explanation for choice of comparators                                                                                                                                                                                                                                                    | 7                   |
| Objectives                                         | 7       | Specific objectives or hypotheses                                                                                                                                                                                                                                                        | 6                   |
| Trial design                                       | 8       | Description of trial design including type of trial (eg, parallel group, crossover, factorial, single group), allocation ratio, and framework (eg, superiority, equivalence, noninferiority, exploratory)                                                                                | 6                   |
| Methods: Participants, interventions, and outcomes |         |                                                                                                                                                                                                                                                                                          |                     |
| Study setting                                      | 9       | Description of study settings (eg, community clinic, academic hospital) and list of countries where data will be collected. Reference to where list of study sites can be obtained                                                                                                       | 6                   |
| Eligibility criteria                               | 10      | Inclusion and exclusion criteria for participants. If applicable, eligibility criteria for study centres and                                                                                                                                                                             | 7                   |



|                                                              |     |                                                                                                                                                                                                                                                                                                                                                                                |       |
|--------------------------------------------------------------|-----|--------------------------------------------------------------------------------------------------------------------------------------------------------------------------------------------------------------------------------------------------------------------------------------------------------------------------------------------------------------------------------|-------|
|                                                              |     | individuals who will perform the interventions (eg, surgeons, psychotherapists)                                                                                                                                                                                                                                                                                                |       |
| Interventions                                                | 11a | Interventions for each group with sufficient detail to allow replication, including how and when they will be administered                                                                                                                                                                                                                                                     | 7     |
|                                                              | 11b | Criteria for discontinuing or modifying allocated interventions for a given trial participant (eg, drug dose change in response to harms, participant request, or improving/worsening disease)                                                                                                                                                                                 | 9     |
|                                                              | 11c | Strategies to improve adherence to intervention protocols, and any procedures for monitoring adherence (eg, drug tablet return, laboratory tests)                                                                                                                                                                                                                              | 9     |
|                                                              | 11d | Relevant concomitant care and interventions that are permitted or prohibited during the trial                                                                                                                                                                                                                                                                                  | 8     |
| Outcomes                                                     | 12  | Primary, secondary, and other outcomes, including the specific measurement variable (eg, systolic blood pressure), analysis metric (eg, change from baseline, final value, time to event), method of aggregation (eg, median, proportion), and time point for each outcome. Explanation of the clinical relevance of chosen efficacy and harm outcomes is strongly recommended | 9,10  |
| Participant timeline                                         | 13  | Time schedule of enrolment, interventions (including any run-ins and washouts), assessments, and visits for participants. A schematic diagram is highly recommended (see Figure)                                                                                                                                                                                               | 10    |
| Sample size                                                  | 14  | Estimated number of participants needed to achieve study objectives and how it was determined, including clinical and statistical assumptions supporting any sample size calculations                                                                                                                                                                                          | 10    |
| Recruitment                                                  | 15  | Strategies for achieving adequate participant enrolment to reach target sample size                                                                                                                                                                                                                                                                                            | 6     |
| Methods: Assignment of interventions (for controlled trials) |     |                                                                                                                                                                                                                                                                                                                                                                                |       |
| Allocation: Sequence generation                              | 16a | Method of generating the allocation sequence (eg, computer-generated random numbers), and list of any factors for stratification. To reduce predictability of a random sequence, details of any planned restriction (eg, blocking) should be provided in a separate document that is unavailable to those who enrol participants or assign interventions                       | 10,11 |
| Allocation concealment mechanism                             | 16b | Mechanism of implementing the allocation sequence (eg, central telephone; sequentially numbered, opaque, sealed envelopes), describing any steps to conceal the sequence until interventions are assigned                                                                                                                                                                      | 11    |
| Implementation                                               | 16c | Who will generate the allocation sequence, who will enroll participants, and who will assign participants to interventions                                                                                                                                                                                                                                                     | 10,11 |
| Blinding (masking)                                           | 17a | Who will be blinded after assignment to                                                                                                                                                                                                                                                                                                                                        | 11    |

|                                                           |     |                                                                                                                                                                                                                                                                                                                                                                                                              |       |
|-----------------------------------------------------------|-----|--------------------------------------------------------------------------------------------------------------------------------------------------------------------------------------------------------------------------------------------------------------------------------------------------------------------------------------------------------------------------------------------------------------|-------|
|                                                           |     | interventions (eg, trial participants, care providers, outcome assessors, data analysts), and how                                                                                                                                                                                                                                                                                                            |       |
|                                                           | 17b | If blinded, circumstances under which unblinding is permissible, and procedure for revealing a participant's allocated intervention during the trial                                                                                                                                                                                                                                                         | 11    |
| <b>Methods: Data collection, management, and analysis</b> |     |                                                                                                                                                                                                                                                                                                                                                                                                              |       |
| Data collection methods                                   | 18a | Plans for assessment and collection of outcome, baseline, and other trial data, including any related processes to promote data quality (eg, duplicate measurements, training of assessors) and a description of study instruments (eg, questionnaires, laboratory tests) along with their reliability and validity, if known. Reference to where data collection forms can be found, if not in the protocol | 11    |
|                                                           | 18b | Plans to promote participant retention and complete follow-up, including list of any outcome data to be collected for participants who discontinue or deviate from intervention protocols                                                                                                                                                                                                                    | 11    |
| Data management                                           | 19  | Plans for data entry, coding, security, and storage, including any related processes to promote data quality (eg, double data entry; range checks for data values). Reference to where details of data management procedures can be found, if not in the protocol                                                                                                                                            | 11    |
| Statistical methods                                       | 20a | Statistical methods for analysing primary and secondary outcomes. Reference to where other details of the statistical analysis plan can be found, if not in the protocol                                                                                                                                                                                                                                     | 11,12 |
|                                                           | 20b | Methods for any additional analyses (eg, subgroup and adjusted analyses)                                                                                                                                                                                                                                                                                                                                     | 11,12 |
|                                                           | 20c | Definition of analysis population relating to protocol non-adherence (eg, as randomised analysis), and any statistical methods to handle missing data (eg, multiple imputation)                                                                                                                                                                                                                              | 12    |
| <b>Methods: Monitoring</b>                                |     |                                                                                                                                                                                                                                                                                                                                                                                                              |       |
| Data monitoring                                           | 21a | Composition of data monitoring committee (DMC); summary of its role and reporting structure; statement of whether it is independent from the sponsor and competing interests; and reference to where further details about its charter can be found, if not in the protocol. Alternatively, an explanation of why a DMC is not needed                                                                        | 11    |
|                                                           | 21b | Description of any interim analyses and stopping guidelines, including who will have access to these interim results and make the final decision to terminate the trial                                                                                                                                                                                                                                      | 11    |
| Harms                                                     | 22  | Plans for collecting, assessing, reporting, and managing solicited and spontaneously reported adverse events and other unintended effects of trial interventions or trial conduct                                                                                                                                                                                                                            | 13    |

|                               |     |                                                                                                                                                                                                                                                                                     |     |
|-------------------------------|-----|-------------------------------------------------------------------------------------------------------------------------------------------------------------------------------------------------------------------------------------------------------------------------------------|-----|
| Auditing                      | 23  | Frequency and procedures for auditing trial conduct, if any, and whether the process will be independent from investigators and the sponsor                                                                                                                                         | 13  |
| Ethics and dissemination      |     |                                                                                                                                                                                                                                                                                     |     |
| Research ethics approval      | 24  | Plans for seeking research ethics committee/institutional review board (REC/IRB) approval                                                                                                                                                                                           | 12  |
| Protocol amendments           | 25  | Plans for communicating important protocol modifications (eg, changes to eligibility criteria, outcomes, analyses) to relevant parties (eg, investigators, REC/IRBs, trial participants, trial registries, journals, regulators)                                                    | 6   |
| Consent or assent             | 26a | Who will obtain informed consent or assent from potential trial participants or authorised surrogates, and how (see Item 32)                                                                                                                                                        | 7,8 |
|                               | 26b | Additional consent provisions for collection and use of participant data and biological specimens in ancillary studies, if applicable                                                                                                                                               | N/A |
| Confidentiality               | 27  | How personal information about potential and enrolled participants will be collected, shared, and maintained in order to protect confidentiality before, during, and after the trial                                                                                                | 11  |
| Declaration of interests      | 28  | Financial and other competing interests for principal investigators for the overall trial and each study site                                                                                                                                                                       | 13  |
| Access to data                | 29  | Statement of who will have access to the final trial dataset, and disclosure of contractual agreements that limit such access for investigators                                                                                                                                     | N/A |
| Ancillary and post-trial care | 30  | Provisions, if any, for ancillary and post-trial care, and for compensation to those who suffer harm from trial participation                                                                                                                                                       | 6   |
| Dissemination policy          | 31a | Plans for investigators and sponsor to communicate trial results to participants, healthcare professionals, the public, and other relevant groups (eg, via publication, reporting in results databases, or other data sharing arrangements), including any publication restrictions | 12  |
|                               | 31b | Authorship eligibility guidelines and any intended use of professional writers                                                                                                                                                                                                      |     |
|                               | 31c | Plans, if any, for granting public access to the full protocol, participant-level dataset, and statistical code                                                                                                                                                                     |     |
| Appendices                    |     |                                                                                                                                                                                                                                                                                     |     |
| Informed consent materials    | 32  | Model consent form and other related documentation given to participants and authorised surrogates                                                                                                                                                                                  | yes |
| Biological specimens          | 33  | Plans for collection, laboratory evaluation, and storage of biological specimens for genetic or molecular analysis in the current trial and for future use in ancillary studies, if applicable                                                                                      |     |

1  
2  
3  
4  
5 \*It is strongly recommended that this checklist be read in conjunction with the SPIRIT 2013  
6 Explanation & Elaboration for important clarification on the items. Amendments to the protocol  
7 should be tracked and dated. The SPIRIT checklist is copyrighted by the SPIRIT Group under the  
8 Creative Commons "Attribution-NonCommercial-NoDerivs 3.0 Unported" license.  
9  
10  
11  
12  
13  
14  
15  
16  
17  
18  
19  
20  
21  
22  
23  
24  
25  
26  
27  
28  
29  
30  
31  
32  
33  
34  
35  
36  
37  
38  
39  
40  
41  
42  
43  
44  
45  
46  
47  
48  
49  
50  
51  
52  
53  
54  
55  
56  
57  
58  
59  
60

For peer review only

# BMJ Open

## Effects of *Lactobacillus rhamnosus* GG and *Bifidobacterium lactis* Bb12 on beta-cell function in children with newly diagnosed type 1 diabetes: protocol of a randomised controlled trial.

|                                 |                                                                                                                                                                                                                                                                                |
|---------------------------------|--------------------------------------------------------------------------------------------------------------------------------------------------------------------------------------------------------------------------------------------------------------------------------|
| Journal:                        | <i>BMJ Open</i>                                                                                                                                                                                                                                                                |
| Manuscript ID                   | bmjopen-2017-017178.R2                                                                                                                                                                                                                                                         |
| Article Type:                   | Protocol                                                                                                                                                                                                                                                                       |
| Date Submitted by the Author:   | 13-Aug-2017                                                                                                                                                                                                                                                                    |
| Complete List of Authors:       | Groele, Lidia; Warszawski Uniwersytet Medyczny 1 Wydział Lekarski, Department of Paediatrics<br>SZAJEWSKA, Hania; The Medical University of Warsaw, Dept of Paediatrics<br>Szypowska, Agnieszka; Warszawski Uniwersytet Medyczny 1 Wydział Lekarski, Department of Paediatrics |
| <b>Primary Subject Heading</b>: | Diabetes and endocrinology                                                                                                                                                                                                                                                     |
| Secondary Subject Heading:      | Paediatrics                                                                                                                                                                                                                                                                    |
| Keywords:                       | probiotics, microbiota, children, RCT                                                                                                                                                                                                                                          |
|                                 |                                                                                                                                                                                                                                                                                |

SCHOLARONE™  
Manuscripts

1  
2  
3 **Effects of *Lactobacillus rhamnosus* GG and *Bifidobacterium lactis* Bb12 on beta-cell**  
4 **function in children with newly diagnosed type 1 diabetes: protocol of a randomised**  
5 **controlled trial.**  
6

7 Lidia Groele, Hania Szajewska, Agnieszka Szypowska

8 The Medical University of Warsaw, Department of Paediatrics, Warsaw, Poland  
9

10  
11  
12 **Corresponding author:**

13 Agnieszka Szypowska, MD, PhD, Assoc Prof

14 Department of Paediatrics, The Medical University of Warsaw

15 Żwirki i Wigury 63A, 02-091 Warsaw, Poland,

16 email: agnieszka.szypowska@gmail.com  
17  
18  
19  
20  
21  
22

23 **Date and protocol version identifier:** 30/06/2017

24 **Key words:** probiotics, microbiota, children, RCT

25 **Word count:** 4765  
26  
27  
28  
29  
30  
31  
32  
33  
34  
35  
36  
37  
38  
39  
40  
41  
42  
43  
44  
45  
46  
47  
48  
49  
50  
51  
52  
53  
54  
55  
56  
57  
58  
59  
60

**ABSTRACT**

**Introduction.** Recent evidence has demonstrated that, among other factors, dysbiosis (imbalances in the composition and function of the gut microbiota) may be relevant in the development of type 1 diabetes (T1D). Thus, gut microbiota may be a target for improving outcomes in subjects with T1D. The aim of the study is to examine the effects of *Lactobacillus rhamnosus* GG and *Bifidobacterium lactis* Bb12 on beta-cell function in children with newly diagnosed T1D.

**Methods and analysis:** A total of 96 children aged 8 to 17 years with newly diagnosed T1D, confirmed by clinical history and the presence of at least one positive autoantibody, will be enrolled in a double-blind, randomised, placebo-controlled trial in which they will receive *Lactobacillus rhamnosus* GG and *Bifidobacterium lactis* Bb12 at a dose of  $10^9$  colony-forming units or an identically appearing placebo, orally, once daily, for 6 months. The follow-up will be for 12 months. The primary outcome measures will be the area under the curve of the C-peptide level during 2-h responses to a mixed meal.

**Ethics and dissemination:** The Bioethics Committee approved the study protocol. The findings of this trial will be submitted to a peer-reviewed paediatric journal. Abstracts will be submitted to relevant national and international conferences.

**Trial registration number:** The study protocol is under registration at ClinicalTrials.gov. NCT03032354

**Strengths and limitations of this study**

- The study design (randomised controlled trial, RCT) is the most robust methodology to assess the effectiveness of therapeutic interventions.
- The findings of this RCT, whether positive or negative, will contribute to the formulation of further recommendations on the use of *Lactobacillus rhamnosus* GG and *Bifidobacterium lactis* Bb12 for improving beta-cell function in children with newly diagnosed type 1 diabetes (T1D).
- It remains unclear which probiotics, alone or in combination, and at which doses, are potentially the most useful for management of T1D.



## INTRODUCTION

### *Type 1 diabetes*

Type 1 diabetes (T1D) involves the autoimmune destruction of the insulin-secreting pancreatic islets of Langerhans, leading to insulin deficiency.<sup>1,2</sup> The prevalence of T1D varies considerably geographically,<sup>3</sup> but in many regions it is rising.<sup>4</sup> The pathophysiology is multifactorial. In addition to genetic background, a number of environmental factors have been claimed to influence the T1D epidemiology, including the mode of birth, early infant diet (e.g., lack of breastfeeding, early introduction of cow's milk, gluten), viral infections, and antibiotic use.<sup>5,6,7</sup> Recent evidence has demonstrated that dysbiosis, defined as imbalances in the composition and function of the gut microbiota, also may be relevant.

### *Gut microbiota & type 1 diabetes*

Current studies suggest that the interaction between gut microbiota and the immune system may be a major factor influencing T1D development. Alterations in gut microbiota composition observed in T1D patients would increase gut permeability. Microbes, microbial metabolites, bacterial products, and the immune responses to them may promote inflammation and induce an alteration in intestinal barrier function. If so, that facilitates greater exposure to the immune system of dietary antigens and microbiota-derived products, which may cause a proinflammatory response and stimulate beta-cell autoimmunity in genetically predisposed subjects.<sup>8</sup>

Compared to healthy controls, subjects with T1D exhibit a less diverse and less stable gut microbiota.<sup>9,10,11,12,13</sup> A low abundance of lactate- and butyrate-producing species has been noted in children with T1D.<sup>14</sup> Butyrate is the main energy source for colonic epithelial cells. It induces mucin synthesis and increases the barrier mechanisms of tight junctions. It also decreases bacterial transport across the gut epithelium.<sup>15,16</sup> Adequate butyrate production is essential for gut integrity and may have a protective effect on the development of anti-islet cell autoantibodies.<sup>17</sup>

It seems that the diabetic gut is underequipped with bacteria that promote protective immune mechanisms.<sup>18</sup> In children with beta-cell autoimmunity, a significant decrease in the numbers of *Lactobacillus* and *Bifidobacterium* was observed.<sup>11</sup> These are the major genera of bacteria that make up the colon flora in humans, constitute intestinal microbial homeostasis, inhibit growth of pathogens, improve the gut mucosal barrier, and modulate local and systemic

1  
2  
3 immune responses. Dysbiosis causes changes in the local immune systems of T1D patients  
4 demonstrated, for example, by the low expression of FOXP3 and impaired induction of  
5 FOXP3-positive regulatory T cells by small intestinal dendritic cells.<sup>19</sup>  
6  
7

8  
9  
10 For a detailed review of studies evaluating the role of the gut microbiota in these patients, see  
11 the review by *Gulden et al.*<sup>20</sup>  
12

### 13 14 15 *Microbiota modulation strategies*

16 With the growing recognition of the role of gut microbiota in health and disease, it has  
17 become clear that gut microbiota may be a target for improving outcomes in subjects affected  
18 by or at risk for certain diseases, including T1D. To date, modification of the gut microbiota  
19 via the provision of probiotics (defined as live microorganisms that, when administered in  
20 adequate amounts, confer a health benefit on the host)<sup>21</sup> is the most extensively studied  
21 strategy. In humans, by far, the most commonly used probiotics are bacteria from the genus  
22 *Lactobacillus* or *Bifidobacterium*.  
23  
24  
25  
26  
27

28  
29  
30 Data on the effects of probiotics in subjects with T1D are very limited. However, preliminary  
31 data are promising. In animals, studies using non-obese diabetic (NOD) mice or a rat model  
32 showed that the development of T1D can be prevented or delayed through modulation of the  
33 intestinal microbiota.<sup>22,23</sup> Administration of *Lactobacillus johnsoni* N6.2, isolated from  
34 BioBreeding diabetes-resistant rats, delays or inhibits the onset of T1D in BioBreeding  
35 diabetes-prone rats. Transmission of segmented filamentous bacteria to the NOD mouse  
36 correlates with disease prevention and the upregulation of Th17 cells in the intestine.<sup>24,25</sup>  
37  
38  
39  
40  
41

42  
43 In humans, one, recent, prospective, cohort study, which was carried out as part of the  
44 TEDDY (The Environmental Determinants of Diabetes in the Young) study, aimed to  
45 examine the association between early probiotic exposure and islet autoimmunity (positive  
46 antibodies to insulin, glutamic acid decarboxylase, or insulinoma antigen 2 on at least two  
47 consecutive visits) in children genetically at increased risk for T1D. This study found that  
48 early (i.e., during the first 27 days of life) administration of probiotics (mainly  
49 *Lactobacillus* and *Bifidobacterium*, given either as a supplement or in infant formula  
50 supplemented with probiotics) may be associated with a reduced risk of islet autoimmunity  
51 [hazard ratio (HR) 0.66, 95% confidence interval (CI) 0.46–0.94], especially in children with  
52 the highest-risk HLA genotype of DR3/4 (HR 0.4, 95% CI 0.21–0.74). Of note, no reduction  
53  
54  
55  
56  
57  
58  
59  
60

1  
2  
3 was seen in children with moderately higher-risk genotypes (HR 0.97, 95% CI 0.62–1.54).<sup>26</sup>  
4  
5 Further studies to confirm this association are needed.  
6  
7

### 8 *Lactobacillus rhamnosus* GG and *Bifidobacterium lactis* B12

9  
10 These are among the world's best-studied probiotics. In the US, both have received a  
11 Generally Recognised As Safe (GRAS) status by the Food and Drug Administration.<sup>27</sup> In  
12 Europe, both have been granted Qualified Presumption of Safety (QPS) status by the  
13 European Food Safety Authority (EFSA) - a status granted on a species level.<sup>28</sup> Previous  
14 studies found that supplementation with *Lactobacillus rhamnosus* GG (*L rhamnosus* GG) and  
15 *Bifidobacterium lactis* Bb12 (*B lactis* Bb12) improved blood glucose control in  
16 normoglycaemic pregnant women and reduced the frequency of gestational diabetes  
17 mellitus,<sup>29,30</sup> thus, suggesting a role for these probiotics in glucose control.  
18  
19  
20  
21  
22  
23

## 24 **TRIAL OBJECTIVES AND HYPOTHESIS**

25  
26 The aim of the study is to examine the effects of *L rhamnosus* GG and *B lactis* Bb12 on beta-  
27 cell function in children with newly diagnosed T1D. We hypothesise that gut microbiota  
28 modulation with the combination of these two probiotics may be used as a tool to modulate  
29 the immune system for preventing islet cell destruction. We also speculate that children who  
30 receive *L rhamnosus* GG and *B lactis* Bb12 at the recognition of T1D will have more  
31 preserved beta-cell function than children who receive placebo.  
32  
33  
34  
35  
36  
37

## 38 **METHODS**

### 39 *Trial design*

40  
41 This study is designed as a randomised, double-blind, placebo-controlled trial with allocation  
42 of 1:1. The trial was registered at the ClinicaTrials.gov (NCT03032354) prior to the inclusion  
43 of the first patient. Any important changes in the protocol will be implemented there.  
44  
45  
46  
47

### 48 *Settings and participants*

49  
50 Recruitment will be through the paediatric diabetes outpatient clinics at two participating  
51 centres in Warsaw, Poland (Department of Paediatrics, the Medical University of Warsaw and  
52 Department of Endocrinology and Diabetology, Children's Memorial Health Institute). Both  
53 are tertiary care hospitals that provide annually diabetes care to more than 200 children with  
54 newly recognised T1D. The personnel are adequately trained and competent in conducting  
55  
56  
57  
58  
59  
60

1  
2  
3 clinical trials. The start of the recruitment is planned in July 2017 and should be completed  
4 within the following 1 year.  
5  
6

### 7 8 *Eligibility criteria*

9 Eligible children must fulfil all of the following inclusion criteria:

- 10  
11 • T1D as defined by ISPAD criteria<sup>31</sup>, diagnosed within 60 days;  
12  
13 • Presence of at least one positive autoantibody [autoantibodies to glutamic acid  
14 decarboxylase (GAD), the tyrosine phosphatase-related insulinoma-associated 2 molecule  
15 (anti-IA-2), islet-cell antibodies (ICA)];  
16  
17 • Age 8-17 years  
18  
19 • Single fasting C-peptide level  $\geq 0.4$ ng/ml  
20  
21 • Written informed consent signed by parents (and patients if older than 16 years).  
22

23 Subjects will be excluded for the following reasons:

- 24  
25 • Antibiotic treatment within 2 months prior to enrolment  
26  
27 • Use of probiotics within 2 weeks prior to enrolment  
28  
29 • Gastrointestinal infection within 2 weeks prior to enrolment  
30  
31 • Chronic gastrointestinal diseases (e.g., inflammatory bowel disease, coeliac disease, food  
32 allergy)  
33  
34 • Immunodeficiency  
35  
36

### 37 38 *Interventions*

39 The intervention will be administration of a combination of two probiotics: *L rhamnosus* GG  
40 (strain deposit number ATCC 53103) and *B lactis* Bb12 (strain deposit number DSM15954).  
41 A placebo comparator was chosen as the gold standard for testing the efficacy of a new  
42 treatment.<sup>32</sup> The placebo will contain maltodextrin, and its taste and appearance will be  
43 identical to those of the active product. The study products will be manufactured in capsules  
44 and supplied free of charge by Chr. Hansen Holding A/S, Denmark. The manufacturer will  
45 have no role in the conception, protocol development, design, or conduct of the study, or in  
46 the analysis or interpretation of the data.  
47  
48  
49  
50  
51  
52

### 53 54 *Study procedure*

55 The study procedures are described in Table 1. Patients and parents/caregivers will receive  
56 oral and written information regarding the study during their regular diabetes outpatient clinic  
57  
58  
59  
60

1  
2  
3 visits within 60 days after T1D recognition. Written informed consent, signed by the legal  
4 caregivers and/or the patients, will be obtained by a physician involved in the study.  
5  
6

7  
8 Participants will be randomly assigned to two groups, receiving either *L rhamnosus* GG and *B*  
9 *lactis* Bb12 at a dose of  $10^9$  colony-forming units (CFU) or placebo, orally, once daily, for 6  
10 months. All study participants will be followed up for up to 12 months after the start of the  
11 intervention. Study visits at month 3, 6, and 12 will be coordinated with diabetes outpatient  
12 clinic visits.  
13  
14  
15

16  
17  
18 During the hospitalisation at diabetes recognition, a blood sample will be obtained for the  
19 measurement of fasting C-peptide, anti-GAD, anti-IA-2, ICA (analysed by radiobinding  
20 assays), and glycated haemoglobin (HbA1c) levels (performed by high-performance liquid  
21 chromatography). As T1D is frequently associated with autoimmune thyroid disease, anti-  
22 thyroid peroxidase (anti-TPO), anti-thyroglobulin (anti-Tg), serum thyroid-stimulating  
23 hormone (TSH), and free thyroxine (fT4) will be assessed (by chemiluminescence method) at  
24 diabetes onset and at month 12. Similarly, as T1D is associated with coeliac disease, all  
25 subjects will be tested for anti-tissue transglutaminase type 2 (anti-TG2) antibodies (analyzed  
26 by Elisa test) and/or endomysial antibodies (EMA) (performed by indirect  
27 immunofluorescence method) at diabetes recognition and at month 12. In addition, at diabetes  
28 onset, total serum IgA will be measured (by nephelometric analysis) to exclude IgA  
29 deficiency. In the case of IgA deficiency, the same type of antibodies in the IgG class will be  
30 analysed. In the case of positive serology, a small-intestine biopsy will be considered to  
31 confirm the diagnosis of coeliac disease in line with current European guidelines.<sup>33</sup>  
32 Interleukins as inflammatory markers will be compared (by Elisa tests) between groups at  
33 diabetes onset and month 6 and 12.  
34  
35  
36  
37  
38  
39  
40  
41  
42  
43  
44  
45

46 At study entry and at all study visits, all eligible children will undergo a physical examination,  
47 including evaluation of anthropometric measurements (weight, height, and body mass index  
48 [BMI]), which will be plotted on WHO 2007 growth curves<sup>34</sup>). The participants also will be  
49 stratified accordingly to Tanner developmental stage  $\leq 3$  or  $>3$ , as assessed by physical  
50 examination. All information regarding treatment modality (e.g., pump, infusion) and  
51 antibiotic use will be collected at these visits. Children will be treated with continuous  
52 subcutaneous insulin infusion or multiple daily injections. The total daily insulin dose and  
53  
54  
55  
56  
57  
58  
59  
60

1  
2  
3 basal insulin will be downloaded from insulin pumps or will be collected from patients'  
4 diaries.  
5  
6

7  
8 In our study, we chose to use the mixed-meal tolerance test (MMTT), as it is widely regarded  
9 as the gold standard for measuring endogenous insulin production among patients with type 1  
10 diabetes.<sup>35</sup> The MMTT will be performed three times: at allocation and at months 6 and 12.  
11 For the MMTT, all eligible participants will consume a standard, mixed meal [liquid-meal  
12 BOOST test (6 mL/kg max 360 ml, Nestle S.A>, Vevey, Switzerland; 237 ml contains 41 g  
13 carbohydrates, 10 g protein, 4 g fat, energy value 240 kcal)]. The C-peptide levels will be  
14 measured in blood samples drawn every 30 minutes for 2 hours after the mixed meal  
15 consumption. The MMTT will be initiated before 10 a.m. with children in the fasting state.  
16 Children treated with an insulin pump will continue use of this pump at the usual basal rate. A  
17 long-acting insulin analogue (glargine or detemir) will be given in the evening of the previous  
18 day. The MMTT will be rescheduled if a child has a capillary glucose value >180 mg/dl or  
19 <70 mg/dl (>10 mmol/l or <3.9 mmol/l).  
20

21 Gut permeability will be measured using zonulin, a biomarker of impaired gut barrier  
22 function, via ELISA (enzyme-linked immunosorbent assay), at months 6 and 12 of the  
23 study.<sup>36</sup>  
24  
25

26 Compliance will be assessed by collecting empty packages and the remainder of the product  
27 that was not used as well as by direct interview with the patient and/or caregiver. Participants  
28 receiving <75% of the recommended doses will be considered as non-compliant.  
29  
30

31 At any point of time, caregivers will have the right to withdraw the participating child from  
32 the study without giving the reason for discontinuation. There will be no effect of this  
33 discontinuation on subsequent physician and/or institutional medical care.  
34  
35

### 36 *End points*

#### 37 *Primary*

- 38 • Area under the curve of the C-peptide level (AUC CP) during 2-h responses to a mixed  
39 meal.  
40

#### 41 *Secondary*

- 42 • Fasting C-peptide concentration  
43  
44  
45  
46  
47  
48  
49  
50  
51  
52  
53  
54  
55  
56  
57  
58  
59  
60

- Insulin requirement (U/kg body mass)
- HbA1c
- Interleukins: IL-1, IL-2, IL-10, TNF- $\alpha$ , IFN- $\gamma$
- Gut permeability
- Anthropometric parameters (weight, height, BMI z-score)
- Side effects (e.g., abdominal pain, diarrhoea, constipation, vomiting, flatulence)
- Occurrence of other autoimmune diseases (e.g., autoimmune thyroid disease, coeliac disease)
- Acute complications of T1D such as severe hypoglycaemia or ketoacidosis

### *Participant timeline*

The time schedule for enrolment, interventions, assessment, and visits for the participants is described in Table 1.

### *Sample size*

The sample size was calculated based on recommendations on sample size calculation to be used in studies on the effects of new agents on the 2-hour AUC of the C-peptide in MMTT in newly diagnosed T1D patients by Lachin.<sup>37</sup> A normalizing transformation  $\ln(x+1)$  for C-peptide AUC is planned to be used. Since there are no studies that have evaluated the use of probiotics in T1D patients, the study plans to detect a 50% increase in the (untransformed) 2-hour AUC of C-peptide values in MMTT at 12th month in the treated group relative to the placebo group. It is assumed that fractions of children in age groups 8-12 and 13-17 years of age are equal (50%). To provide 85% power using a one-sided test at the confidence level of 0.05, with 1:1 randomization and assuming a drop-out rate of 10%, a sample size of 96 subjects is needed (calculation based on mean and RMSE estimates 0.25 and 0.142, and 0.30 and 0.204 for age groups 8-12 years and 13-17 years, respectively).

### *Randomisation*

The randomisation list, which is separate for each centre, will be generated using the statistical program StatsDirect by an independent person and will be kept by a staff member not involved in the trial. In order to obtain comparable groups, block randomisation will be



1  
2  
3 performed (each block will contain four patients: 2 in the intervention group and 2 in the  
4 control group).  
5  
6

### 7 8 *Blinding*

9 All participants and investigators will be blinded to the assigned treatment throughout the  
10 study. The products for both groups will be similar in terms of smell and colour and will be  
11 packed in identical packages. Researchers, caregivers, outcome assessors, and the person  
12 responsible for the statistical analysis will be blinded to the intervention until completion of  
13 the study.  
14  
15  
16  
17

### 18 19 *Allocation concealment*

20 The study products will be packaged and assigned consecutive numbers according to the  
21 randomisation list. Independent personnel not involved in the conduct of the trial will  
22 dispense the numbered study products.  
23  
24  
25  
26

### 27 28 *Data collection and management*

29 All study participants will be assigned a study identification number. Case report forms  
30 (CRFs) will be completed on paper forms. Data will then be entered and stored in a password-  
31 protected electronic database. The original paper copies of CRFs and all study data will be  
32 stored in a locker within the study site, accessible to the involved researchers only. Insulin  
33 requirements, HbA1c values, and anthropometric parameters will be collected from all  
34 participants who discontinue or deviate from the intervention protocols.  
35  
36  
37  
38  
39

### 40 41 *Monitoring*

42 An independent Data and Safety Monitoring Board (DSMB) will be set up prior to the start of  
43 the study. The DSMB will review data after recruitment of 25%, 50% and 75% participants to  
44 review the study progress and all adverse events.  
45  
46  
47  
48

### 49 50 **Statistical analysis**

51 All statistical analyses will be performed with the computer software StatsDirect.  
52 In the case of descriptive statistics for categorical variables, the number and percentage of  
53 occurrences will be reported. The distribution of continuous variables will be first evaluated  
54 using the Shapiro-Wilk test, then, in the case of variables with a normal distribution, the mean  
55 and standard deviation will be provided; if not, the median and the 25th and 75th percentile  
56  
57  
58  
59  
60



1  
2  
3 will be reported. For each variable, the number of missing data will be given. Categorical  
4 variables will be compared using the Fisher test or chi-squared test, as appropriate. Normally  
5 distributed variables will be compared using the Student's t-test; the Mann-Whitney test will  
6 be used for variables that are not normally distributed. If applicable, paired tests will be used.  
7  
8  
9

10  
11 In the analysis of primary endpoint, a pre-specified analysis of covariance (ANCOVA) model  
12 will be used; the change from baseline to the 12th month in the AUC of the C-peptide level  
13 will be used as the response variable, with study treatment and baseline AUC values as  
14 covariates. A normalizing transformation  $\ln(x+1)$  for the C-peptide AUC is planned to be  
15 used. In an additional exploratory analysis, the mixed-effect model for C-peptide AUC as a  
16 response variable will be built, with both random intercept and slope adjusting for treatment  
17 assignment, time (0, 6, and 12 months), baseline C-peptide AUC, age, gender, and Tanner  
18 developmental stage ( $\leq 3$  or  $> 3$ ).  
19  
20  
21  
22  
23  
24  
25

26 Similarly, in the analysis of secondary endpoints, a pre-specified ANCOVA model will be  
27 used; the change from baseline to the 12th month in HbA1c level, insulin dosage, fasting C-  
28 peptide concentration, interleukin levels, and gut permeability will be used as the response  
29 variables, with study treatment and the baseline AUC value as covariates. In an additional  
30 exploratory analysis, mixed-effect models for each of the above variables as response  
31 variables will be built, with both random intercept and slope adjusting for treatment  
32 assignment, time (0, 6, and 12 months), baseline values, age, gender, and Tanner  
33 developmental stage ( $\leq 3$  or  $> 3$ ).  
34  
35  
36  
37  
38  
39  
40

41 Moreover, for acute complications of T1D, the relative risk (RR) with 95% confidence  
42 interval (CI) and number needed to treat (NNT) will be calculated. For all models,  
43 coefficients with 95% CI and p-values will be reported. The 95% CI will be provided in  
44 descriptive statistics for changes in time for continuous variables.  
45  
46  
47  
48

49 Subgroup analysis will be conducted, and the Tanner developmental stage ( $\leq 3$  or  $> 3$ ) will be  
50 used to form the subgroups of the analyses.  
51  
52  
53

54 Missing data will not be replaced. Two-sided tests will be used for all hypotheses. The  
55 significance level will be set at 0.05. All analyses will be performed on the intention-to-treat  
56 basis (i.e., all participants are included in the arm to which they were allocated, whether or not  
57  
58  
59  
60

1  
2  
3 they received [or completed] the intervention given to that arm) and per-protocol analysis  
4 (i.e., an analysis of the subset of participants who complied with the protocol).  
5  
6

### 7 8 **Harms**

9  
10 Data on adverse events will be collected. All serious adverse events will be immediately  
11 reported to the project leader who will be responsible for notifying the Ethics Committee, all  
12 participating investigators, and the manufacturer of the study products.  
13

### 14 15 16 **Auditing**

17 The Ethics Committee did not require auditing for this study.  
18  
19

### 20 21 **Ethics and dissemination**

22 The study was approved by the Ethics Committee of the Medical University of Warsaw.  
23 Verbal and written information regarding informed consent will be presented to the caregivers  
24 and/or patients. Any modifications to the protocol that may affect the conduct of the study  
25 will be presented to the Committee. The full protocol will be available freely due to open  
26 access publication. The findings of this RCT will be submitted to a peer-reviewed journal.  
27 Abstracts will be submitted to relevant national and international conferences. The standards  
28 from the guidelines of the Consolidated Standards of Reporting Trials (CONSORT) will be  
29 followed for this RCT. All investigators will have access to the final trial dataset.  
30  
31  
32  
33  
34  
35  
36

37  
38 **Contributorship statement:** AS conceptualised the study. LG developed the first draft of the  
39 manuscript. HS, AS, LG contributed to the development of the study protocol and approved  
40 the final draft of the manuscript.  
41  
42  
43

44  
45 **Funding statement:** This study will be funded by grant RG 5/2016 provided by the Nutricia  
46 Foundation, 6 Bobrowiecka Street, 00-728 Warsaw, Poland, phone: +48 (0) 22 55 00 068 and  
47 the Polish Diabetes Association. M. Malecki M.D., Ph.D. Department of Metabolic Diseases  
48 Jagiellonian University, Medical College, 15 Kopernika Street, 31-501 Krakow, POLAND,  
49 phone: (00 48-12) 424-83-05. The funders will have no role in the conception, protocol  
50 development, design, or conduct of the study, or in the analysis or interpretation of the data.  
51  
52  
53  
54

55  
56 **Competing interests statement:** The authors declare that they have no competing interests.  
57  
58  
59  
60

Table 1 Timetable of activities planned during the study.

|                                                                                    | Study period |           |            |                     |                       |                       |                        |
|------------------------------------------------------------------------------------|--------------|-----------|------------|---------------------|-----------------------|-----------------------|------------------------|
|                                                                                    | T1D onset    | Enrolment | Allocation | Post-allocation     |                       |                       | Close-out              |
| Time point                                                                         | - 60 days    | 0         | 0          | Day 1 <sup>st</sup> | Month 3 <sup>rd</sup> | Month 6 <sup>th</sup> | Month 12 <sup>th</sup> |
| <b>Enrolment:</b>                                                                  |              |           |            |                     |                       |                       |                        |
| Eligibility screen                                                                 |              | +         |            |                     |                       |                       |                        |
| Informed consent                                                                   |              | +         |            |                     |                       |                       |                        |
| Allocation                                                                         |              |           | +          |                     |                       |                       |                        |
| <b>Interventions:</b>                                                              |              |           |            |                     |                       |                       |                        |
| Lactobacillus rhamnosus GG and Bifidobacterium lactis Bb12                         |              |           |            | ←————→              |                       |                       |                        |
| Placebo                                                                            |              |           |            | ←————→              |                       |                       |                        |
| <b>Assessments:</b>                                                                |              |           |            |                     |                       |                       |                        |
| Anthropometric measurement (body weight and height; BMI; Tanner stage)             |              |           | +          |                     | +                     | +                     | +                      |
| Fasting C-peptide                                                                  | +            |           |            |                     |                       |                       |                        |
| GADA, IA2A, ICA                                                                    | +            |           |            |                     |                       | +                     | +                      |
| Total IgA                                                                          | +            |           |            |                     |                       |                       |                        |
| TTGA                                                                               | +            |           |            |                     |                       |                       | +                      |
| Anti-Tg, anti-TPO, TSH, fT4                                                        | +            |           |            |                     |                       |                       | +                      |
| HbA1c                                                                              | +            |           | +          |                     | +                     | +                     | +                      |
| Interleukins: IL-1, IL-2, IL-10, TNF- $\alpha$ , IFN- $\gamma$                     | +            |           |            |                     |                       | +                     | +                      |
| C-peptide during mixed-meal test                                                   |              |           | +          |                     |                       | +                     | +                      |
| Gut permeability                                                                   |              |           |            |                     |                       | +                     | +                      |
| Side effects (e.g., abdominal pain, diarrhoea, constipation, vomiting, flatulence) |              |           |            |                     | +                     | +                     | +                      |
| Severe hypoglycaemia, ketoacidosis                                                 |              |           |            |                     | +                     | +                     | +                      |
| Return of non-used study products                                                  |              |           |            |                     |                       | +                     |                        |

BMI: body mass index; HbA1c: glycated haemoglobin; IL-1: interleukin-1; IL-2: interleukin-2; IL-10: interleukin-10; TNF- $\alpha$ : tumor necrosis factor alpha; IFN- $\gamma$ : interferon gamma; anti-Tg: antithyroglobulin antibody; anti-TPO: anti-thyroid peroxidase antibodies; TSH: thyroid - stimulating hormone; fT4: free thyroxine; TTGA: tissue transglutaminase antibody; IgA:

immunoglobulin A; ICA: islet cell cytoplasmic autoantibodies; GADA: glutamic acid decarboxylase autoantibodies; IA2A: tyrosine phosphatase autoantibodies.

## REFERENCES

- <sup>1</sup> Atkinson MA, Eisenbarth GS, Michels AW. Type 1 diabetes. *Lancet* 2014;383:69-82.
- <sup>2</sup> American Diabetes Association. Standards of medical care in diabetes-2014. *Diab Care* 2014;Supl.1:s14-s80.
- <sup>3</sup> Patterson CC, Dahlquist GG, Gyürüs E, et al. EURODIAB Study Group Incidence trends for childhood type 1 diabetes in Europe during 1989–2003 and predicted new cases 2005–20: a multicentre prospective registration study. *Lancet* 2009;373: 2027–33.
- <sup>4</sup> DIAMOND Project Group. Incidence and trends of childhood type 1 diabetes worldwide 1990–1999. *Diabet Med* 2006;23: 857–66.
- <sup>5</sup> Mejía-León ME, Petrosino JF, Ajami NJ, et al. Fecal microbiota imbalance in Mexican children with type 1 diabetes. *Sci Rep* 2014;4:3814.
- <sup>6</sup> Patelarou E, Girvalaki C, Brokalaki H, et al. Current evidence on the associations of breastfeeding, infant formula, and cow's milk introduction with type 1 diabetes mellitus: a systematic review. *Nutr Rev* 2012;70:509-19.
- <sup>7</sup> Knip M, Virtanen SM, Akerblom HK. Infant feeding and the risk of type 1 diabetes. *Am J Clin Nutr* 2010;91:1506–13.
- <sup>8</sup> Semenkovich CF, Danska J, Darsow T, et al. American Diabetes Association and JDRF Research symposium: diabetes and the microbiome. *Diabetes* 2015;64:3967-77.
- <sup>9</sup> Giongo A, Gano KA, Crabb DB et al. Toward defining the autoimmune microbiome for type 1 diabetes. *ISME J* 2011;5:82-91.
- <sup>10</sup> Brown CT, Davis-Richardson AG, Giongo A, et al. Gut microbiome metagenomics analysis suggests a functional model for the development of autoimmunity for type 1 diabetes. *PLoS One* 2011;6:e25792.
- <sup>11</sup> Murri M, Leiva I, Gomez-Zumaquero JM, et al. Gut microbiota in children with type 1 diabetes differs from that in healthy children: a case-control study. *BMC Med* 2013;11:46.
- <sup>12</sup> de Goffau MC, Luopajarvi K, Knip M ,et al. Fecal microbiota composition differs between children with  $\beta$ -cell autoimmunity and those without. *Diabetes* 2013;62:1238-44.
- <sup>13</sup> Endesfelder D, zu Castell W, Ardisson A, et al. Compromised gut microbiota networks in children with anti-islet cell autoimmunity. *Diabetes* 2014;63:2006–14.
- <sup>14</sup> Vaarala O. Human intestinal microbiota and type 1 diabetes. *Curr Diab Rep* 2013;13:601-7.

- 1  
2  
3  
4  
5  
6  
7  
8  
9  
10  
11  
12  
13  
14  
15  
16  
17  
18  
19  
20  
21  
22  
23  
24  
25  
26  
27  
28  
29  
30  
31  
32  
33  
34  
35  
36  
37  
38  
39  
40  
41  
42  
43  
44  
45  
46  
47  
48  
49  
50  
51  
52  
53  
54  
55  
56  
57  
58  
59  
60
- 
- <sup>15</sup> Hague A, Butt AJ, Paraskeva C. The role of butyrate in human colonic epithelial cells: an energy source or inducer of differentiation and apoptosis? *Proc Nutr Soc* 1996;55:937-43.
- <sup>16</sup> Peng L, Li ZR, Green RS, et al. Butyrate enhances the intestinal barrier by facilitating tight junction assembly via activation of AMP-activated protein kinase in Caco-2 cell monolayers. *J Nutr* 2009;139:1619-25.
- <sup>17</sup> Endesfelder D, Engel M, Davis-Richardson AG, et al. Towards a functional hypothesis relating anti-islet cell autoimmunity to the dietary impact on microbial communities and butyrate production. *Microbiome* 2016;4:17.
- <sup>18</sup> Vaarala O. Gut microbiota and type 1 diabetes. *Rev Diabet Stud* 2012;9:251-9.
- <sup>19</sup> Badami E, Sorini C, Coccia M, et al. Defective differentiation of regulatory FoxP3+ T cells by small-intestinal dendritic cells in patients with type 1 diabetes. *Diabetes* 2011;60:2120-4.
- <sup>20</sup> Gulden E, Wong FS, Wen L. The gut microbiota and Type 1 Diabetes. *Clin Immunol* 2015;159:143-53.
- <sup>21</sup> Hill C, Guarner F, Reid G, et al. Expert consensus document. The International Scientific Association for Probiotics and Prebiotics consensus statement on the scope and appropriate use of the term probiotic. *Nat Rev Gastroenterol Hepatol* 2014;11:506-14.
- <sup>22</sup> King C, Sarvetnick N. The incidence of type-1 diabetes in NOD mice is modulated by restricted flora not germ-free conditions *PLoS One* 2011;6:e17049.
- <sup>23</sup> Atkinson MA, Chervonsky A. Does the gut microbiota have a role in type 1 diabetes? Early evidence from humans and animal models of the disease. *Diabetologia* 2012;55:2868-77.
- <sup>24</sup> Valladares R, Sankar D, Li N, et al. Lactobacillus johnsonii N6.2 mitigates the development of type 1 diabetes in BB-DP rats. *PLoS One* 2010;5(5):e10507.
- <sup>25</sup> Kriegel MA, Sefik E, Hill JA, et al. Naturally transmitted segmented filamentous bacteria segregate with diabetes protection in nonobese diabetic mice. *Proc Natl Acad Sci U S A* 2011;108:11548-53.
- <sup>26</sup> Uusitalo U, Liu X, Yang J, et al. Association of Early Exposure of Probiotics and Islet Autoimmunity in the TEDDY Study. *JAMA Pediatr* 2015;9:1-9.
- <sup>27</sup> <http://www.accessdata.fda.gov/scripts/fdcc/?set=GRASNotices> (accessed 31 March 2017).
- <sup>28</sup> <http://www.efsa.europa.eu/en/topics/topic/qps.htm> (accessed 31 March 2017).
- <sup>29</sup> Laitinen K, Poussa T, Isolauri E. Nutrition, Allergy, Mucosal Immunology and Intestinal Microbiota Group. Probiotics and dietary counselling contribute to glucose regulation during and after pregnancy: a randomised controlled trial. *Br J Nutr* 2009;101:1679-87.

1  
2  
3  
4 <sup>30</sup> Luoto R, Laitinen K, Nermes M, et al. Impact of maternal probiotic-supplemented dietary  
5 counselling on pregnancy outcome and prenatal and postnatal growth: a double-blind,  
6 placebo-controlled study. *Br J Nutr* 2010;103:1792-9.

7  
8  
9 <sup>31</sup> Craig ME, Jefferies C, Dabelea D, et al. Definition, epidemiology, and classification of  
10 diabetes in children and adolescents. *Pediatric Diabetes* 2014; 15 (Suppl. 20): 4–17.

11  
12 <sup>32</sup> Castro M. Placebo versus best-available-therapy control group in clinical trials for  
13 pharmacologic therapies which is better? *Proc Am Thorac Soc* 2007;4:570–3.

14  
15 <sup>33</sup> Husby S, Koletzko S, Korponay-Szabó IR et al. European Society for Pediatric  
16 Gastroenterology, Hepatology, and Nutrition guidelines for the diagnosis of coeliac disease. *J*  
17 *Pediatr Gastroenterol Nutr* 2012;54(1):136-60. Erratum in: *J Pediatr Gastroenterol Nutr*  
18 2012;54:572

19  
20 <sup>34</sup> [http:// www.who.int/growthref/en/](http://www.who.int/growthref/en/) (accessed 31 March 2017).

21  
22  
23  
24 <sup>35</sup> Greenbaum CJ, Mandrup-Poulsen T, McGee PF, et al. Mixed-meal tolerance test versus  
25 glucagon stimulation test for the assessment of beta-cell function in therapeutic trials in type 1  
26 diabetes. *Diabetes Care* 2008;31:1966–71.

27  
28  
29  
30 <sup>36</sup> Esnafoglu E, Cirrik S, Ayyildiz SN et al. Increased Serum Zonulin Levels as an Intestinal  
31 Permeability Marker in Autistic Subjects. *The Journal of Pediatrics*, 2017 (available online  
32 11 May 2017).

33  
34  
35  
36 <sup>37</sup> Lachin JM, McGee PL, Greenbaum CJ et al. Sample size requirements for studies of  
37 treatment effects on beta-cell function in newly diagnosed type 1 diabetes. *PLoS One*  
38 2011;6:e26471.

SPIRIT 2013 Checklist: Recommended items to address in a clinical trial protocol and related documents\*

| Section/item                                       | Item No | Description                                                                                                                                                                                                                                                                              | Reported on page No |
|----------------------------------------------------|---------|------------------------------------------------------------------------------------------------------------------------------------------------------------------------------------------------------------------------------------------------------------------------------------------|---------------------|
| Administrative information                         |         |                                                                                                                                                                                                                                                                                          |                     |
| Title                                              | 1       | Descriptive title identifying the study design, population, interventions, and, if applicable, trial acronym                                                                                                                                                                             | 1                   |
| Trial registration                                 | 2a      | Trial identifier and registry name. If not yet registered, name of intended registry                                                                                                                                                                                                     | 2,6                 |
|                                                    | 2b      | All items from the World Health Organization Trial Registration Data Set                                                                                                                                                                                                                 | YES                 |
| Protocol version                                   | 3       | Date and version identifier                                                                                                                                                                                                                                                              | 1                   |
| Funding                                            | 4       | Sources and types of financial, material, and other support                                                                                                                                                                                                                              | 13                  |
| Roles and responsibilities                         | 5a      | Names, affiliations, and roles of protocol contributors                                                                                                                                                                                                                                  | 13                  |
|                                                    | 5b      | Name and contact information for the trial sponsor                                                                                                                                                                                                                                       | 13                  |
|                                                    | 5c      | Role of study sponsor and funders, if any, in study design; collection, management, analysis, and interpretation of data; writing of the report; and the decision to submit the report for publication, including whether they will have ultimate authority over any of these activities | 7, 13               |
|                                                    | 5d      | Composition, roles, and responsibilities of the coordinating centre, steering committee, endpoint adjudication committee, data management team, and other individuals or groups overseeing the trial, if applicable (see Item 21a for data monitoring committee)                         | N/A                 |
| Introduction                                       |         |                                                                                                                                                                                                                                                                                          |                     |
| Background and rationale                           | 6a      | Description of research question and justification for undertaking the trial, including summary of relevant studies (published and unpublished) examining benefits and harms for each intervention                                                                                       | 4-6                 |
|                                                    | 6b      | Explanation for choice of comparators                                                                                                                                                                                                                                                    | 7                   |
| Objectives                                         | 7       | Specific objectives or hypotheses                                                                                                                                                                                                                                                        | 6                   |
| Trial design                                       | 8       | Description of trial design including type of trial (eg, parallel group, crossover, factorial, single group), allocation ratio, and framework (eg, superiority, equivalence, noninferiority, exploratory)                                                                                | 6                   |
| Methods: Participants, interventions, and outcomes |         |                                                                                                                                                                                                                                                                                          |                     |
| Study setting                                      | 9       | Description of study settings (eg, community clinic, academic hospital) and list of countries where data will be collected. Reference to where list of study sites can be obtained                                                                                                       | 6                   |
| Eligibility criteria                               | 10      | Inclusion and exclusion criteria for participants. If applicable, eligibility criteria for study centres and                                                                                                                                                                             | 7                   |



|                                                              |     |                                                                                                                                                                                                                                                                                                                                                                                |       |
|--------------------------------------------------------------|-----|--------------------------------------------------------------------------------------------------------------------------------------------------------------------------------------------------------------------------------------------------------------------------------------------------------------------------------------------------------------------------------|-------|
|                                                              |     | individuals who will perform the interventions (eg, surgeons, psychotherapists)                                                                                                                                                                                                                                                                                                |       |
| Interventions                                                | 11a | Interventions for each group with sufficient detail to allow replication, including how and when they will be administered                                                                                                                                                                                                                                                     | 7     |
|                                                              | 11b | Criteria for discontinuing or modifying allocated interventions for a given trial participant (eg, drug dose change in response to harms, participant request, or improving/worsening disease)                                                                                                                                                                                 | 9     |
|                                                              | 11c | Strategies to improve adherence to intervention protocols, and any procedures for monitoring adherence (eg, drug tablet return, laboratory tests)                                                                                                                                                                                                                              | 9     |
|                                                              | 11d | Relevant concomitant care and interventions that are permitted or prohibited during the trial                                                                                                                                                                                                                                                                                  | 8     |
| Outcomes                                                     | 12  | Primary, secondary, and other outcomes, including the specific measurement variable (eg, systolic blood pressure), analysis metric (eg, change from baseline, final value, time to event), method of aggregation (eg, median, proportion), and time point for each outcome. Explanation of the clinical relevance of chosen efficacy and harm outcomes is strongly recommended | 9,10  |
| Participant timeline                                         | 13  | Time schedule of enrolment, interventions (including any run-ins and washouts), assessments, and visits for participants. A schematic diagram is highly recommended (see Figure)                                                                                                                                                                                               | 10    |
| Sample size                                                  | 14  | Estimated number of participants needed to achieve study objectives and how it was determined, including clinical and statistical assumptions supporting any sample size calculations                                                                                                                                                                                          | 10    |
| Recruitment                                                  | 15  | Strategies for achieving adequate participant enrolment to reach target sample size                                                                                                                                                                                                                                                                                            | 6     |
| Methods: Assignment of interventions (for controlled trials) |     |                                                                                                                                                                                                                                                                                                                                                                                |       |
| Allocation: Sequence generation                              | 16a | Method of generating the allocation sequence (eg, computer-generated random numbers), and list of any factors for stratification. To reduce predictability of a random sequence, details of any planned restriction (eg, blocking) should be provided in a separate document that is unavailable to those who enrol participants or assign interventions                       | 10,11 |
| Allocation concealment mechanism                             | 16b | Mechanism of implementing the allocation sequence (eg, central telephone; sequentially numbered, opaque, sealed envelopes), describing any steps to conceal the sequence until interventions are assigned                                                                                                                                                                      | 11    |
| Implementation                                               | 16c | Who will generate the allocation sequence, who will enroll participants, and who will assign participants to interventions                                                                                                                                                                                                                                                     | 10,11 |
| Blinding (masking)                                           | 17a | Who will be blinded after assignment to                                                                                                                                                                                                                                                                                                                                        | 11    |



|                                                           |     |                                                                                                                                                                                                                                                                                                                                                                                                              |       |
|-----------------------------------------------------------|-----|--------------------------------------------------------------------------------------------------------------------------------------------------------------------------------------------------------------------------------------------------------------------------------------------------------------------------------------------------------------------------------------------------------------|-------|
|                                                           |     | interventions (eg, trial participants, care providers, outcome assessors, data analysts), and how                                                                                                                                                                                                                                                                                                            |       |
|                                                           | 17b | If blinded, circumstances under which unblinding is permissible, and procedure for revealing a participant's allocated intervention during the trial                                                                                                                                                                                                                                                         | 11    |
| <b>Methods: Data collection, management, and analysis</b> |     |                                                                                                                                                                                                                                                                                                                                                                                                              |       |
| Data collection methods                                   | 18a | Plans for assessment and collection of outcome, baseline, and other trial data, including any related processes to promote data quality (eg, duplicate measurements, training of assessors) and a description of study instruments (eg, questionnaires, laboratory tests) along with their reliability and validity, if known. Reference to where data collection forms can be found, if not in the protocol | 11    |
|                                                           | 18b | Plans to promote participant retention and complete follow-up, including list of any outcome data to be collected for participants who discontinue or deviate from intervention protocols                                                                                                                                                                                                                    | 11    |
| Data management                                           | 19  | Plans for data entry, coding, security, and storage, including any related processes to promote data quality (eg, double data entry; range checks for data values). Reference to where details of data management procedures can be found, if not in the protocol                                                                                                                                            | 11    |
| Statistical methods                                       | 20a | Statistical methods for analysing primary and secondary outcomes. Reference to where other details of the statistical analysis plan can be found, if not in the protocol                                                                                                                                                                                                                                     | 11,12 |
|                                                           | 20b | Methods for any additional analyses (eg, subgroup and adjusted analyses)                                                                                                                                                                                                                                                                                                                                     | 11,12 |
|                                                           | 20c | Definition of analysis population relating to protocol non-adherence (eg, as randomised analysis), and any statistical methods to handle missing data (eg, multiple imputation)                                                                                                                                                                                                                              | 12    |
| <b>Methods: Monitoring</b>                                |     |                                                                                                                                                                                                                                                                                                                                                                                                              |       |
| Data monitoring                                           | 21a | Composition of data monitoring committee (DMC); summary of its role and reporting structure; statement of whether it is independent from the sponsor and competing interests; and reference to where further details about its charter can be found, if not in the protocol. Alternatively, an explanation of why a DMC is not needed                                                                        | 11    |
|                                                           | 21b | Description of any interim analyses and stopping guidelines, including who will have access to these interim results and make the final decision to terminate the trial                                                                                                                                                                                                                                      | 11    |
| Harms                                                     | 22  | Plans for collecting, assessing, reporting, and managing solicited and spontaneously reported adverse events and other unintended effects of trial interventions or trial conduct                                                                                                                                                                                                                            | 13    |

|                               |     |                                                                                                                                                                                                                                                                                     |     |
|-------------------------------|-----|-------------------------------------------------------------------------------------------------------------------------------------------------------------------------------------------------------------------------------------------------------------------------------------|-----|
| Auditing                      | 23  | Frequency and procedures for auditing trial conduct, if any, and whether the process will be independent from investigators and the sponsor                                                                                                                                         | 13  |
| Ethics and dissemination      |     |                                                                                                                                                                                                                                                                                     |     |
| Research ethics approval      | 24  | Plans for seeking research ethics committee/institutional review board (REC/IRB) approval                                                                                                                                                                                           | 12  |
| Protocol amendments           | 25  | Plans for communicating important protocol modifications (eg, changes to eligibility criteria, outcomes, analyses) to relevant parties (eg, investigators, REC/IRBs, trial participants, trial registries, journals, regulators)                                                    | 6   |
| Consent or assent             | 26a | Who will obtain informed consent or assent from potential trial participants or authorised surrogates, and how (see Item 32)                                                                                                                                                        | 7,8 |
|                               | 26b | Additional consent provisions for collection and use of participant data and biological specimens in ancillary studies, if applicable                                                                                                                                               | N/A |
| Confidentiality               | 27  | How personal information about potential and enrolled participants will be collected, shared, and maintained in order to protect confidentiality before, during, and after the trial                                                                                                | 11  |
| Declaration of interests      | 28  | Financial and other competing interests for principal investigators for the overall trial and each study site                                                                                                                                                                       | 13  |
| Access to data                | 29  | Statement of who will have access to the final trial dataset, and disclosure of contractual agreements that limit such access for investigators                                                                                                                                     | 13  |
| Ancillary and post-trial care | 30  | Provisions, if any, for ancillary and post-trial care, and for compensation to those who suffer harm from trial participation                                                                                                                                                       | 6   |
| Dissemination policy          | 31a | Plans for investigators and sponsor to communicate trial results to participants, healthcare professionals, the public, and other relevant groups (eg, via publication, reporting in results databases, or other data sharing arrangements), including any publication restrictions | 12  |
|                               | 31b | Authorship eligibility guidelines and any intended use of professional writers                                                                                                                                                                                                      |     |
|                               | 31c | Plans, if any, for granting public access to the full protocol, participant-level dataset, and statistical code                                                                                                                                                                     |     |
| Appendices                    |     |                                                                                                                                                                                                                                                                                     |     |
| Informed consent materials    | 32  | Model consent form and other related documentation given to participants and authorised surrogates                                                                                                                                                                                  | yes |
| Biological specimens          | 33  | Plans for collection, laboratory evaluation, and storage of biological specimens for genetic or molecular analysis in the current trial and for future use in ancillary studies, if applicable                                                                                      |     |

1  
2  
3  
4  
5 \*It is strongly recommended that this checklist be read in conjunction with the SPIRIT 2013  
6 Explanation & Elaboration for important clarification on the items. Amendments to the protocol  
7 should be tracked and dated. The SPIRIT checklist is copyrighted by the SPIRIT Group under the  
8 Creative Commons "Attribution-NonCommercial-NoDerivs 3.0 Unported" license.  
9  
10  
11  
12  
13  
14  
15  
16  
17  
18  
19  
20  
21  
22  
23  
24  
25  
26  
27  
28  
29  
30  
31  
32  
33  
34  
35  
36  
37  
38  
39  
40  
41  
42  
43  
44  
45  
46  
47  
48  
49  
50  
51  
52  
53  
54  
55  
56  
57  
58  
59  
60

For peer review only
